# Supplementary material
Source: PubMed Central journal article supplement (PMC4558682)
Supplement: supp_tpc.114.131086_tpc131086_Supplemental.pdf [file supp_tpc.114.131086_tpc131086_Supplemental.pdf]

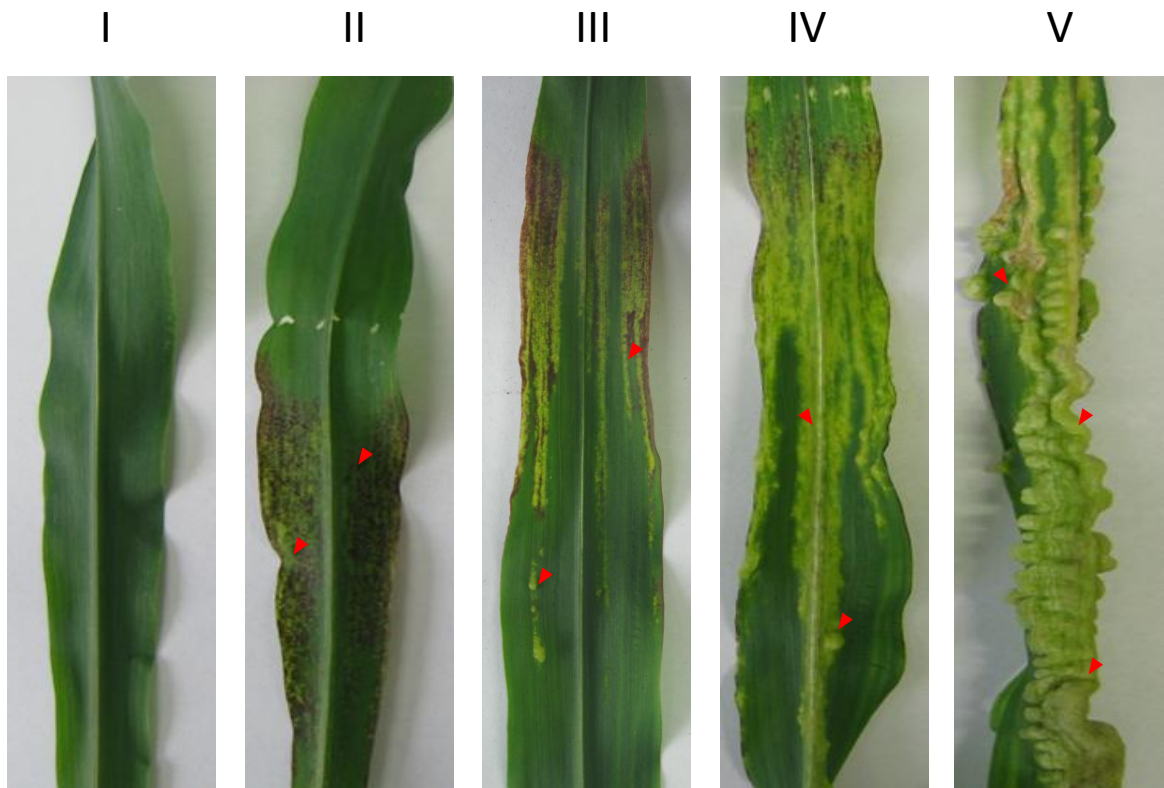

**Supplemental Figure 1. Scoring Scheme for Leaf Tumors Based on Symptoms Observed at 12 dpi.**

The symptoms were classified into five categories based on increasing symptom severity, and tumor size. I, No symptoms; II, Chlorosis of the leaf; III, Small tumors in range of 1-4 mm in diameter; IV, Tumors of 6-10 mm in diameter; and V, Heavy tumors > 15 mm in diameter resulting in a highly distorted leaf axis. All characteristic symptoms are marked with the red arrowheads.

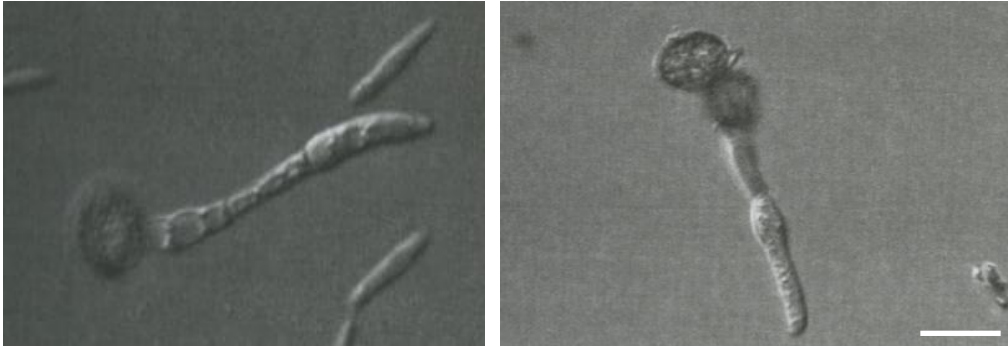

**Supplemental Figure 2. SG200 $\Delta$ see1 Mutant Completes its Entire Life Cycle.**

The spores formed in Anther tumors caused by the SG200 $\Delta$ see1 mutant germinate as well like the wild-type *U. maydis* strain indicating that *see1* deletion does not result in premature termination of the life cycle.

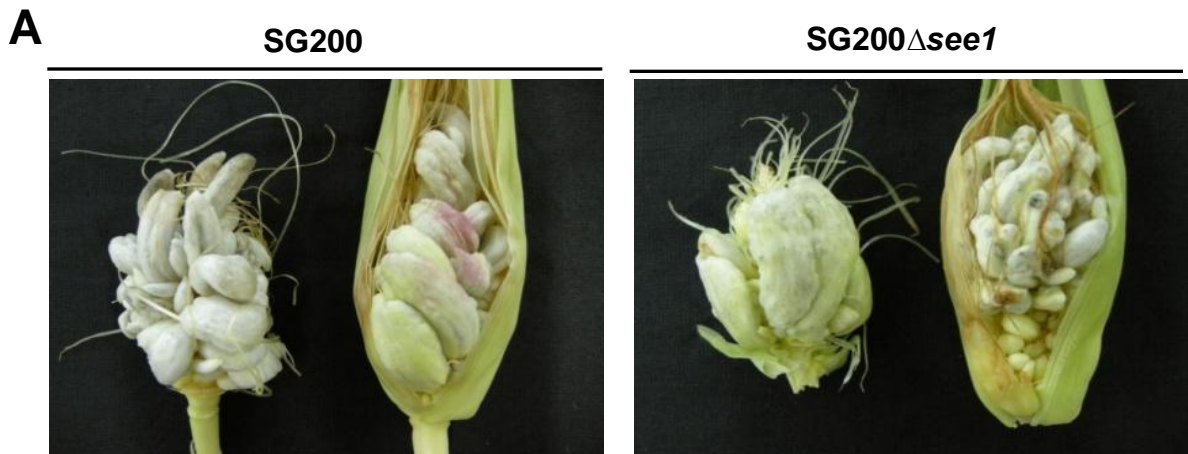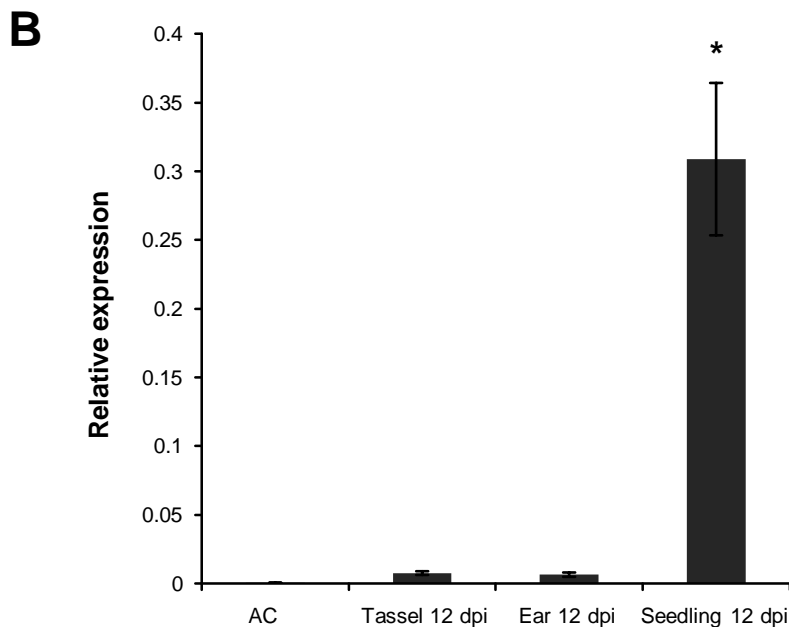

**Supplemental Figure 3. Formation of Ear Tumors in SG200 $\Delta$ see1 Demonstrates the Independence of Floral Tumors on See1 Activity.**

**(A)** Comparison of the tumor phenotype in maize ear tissue of maize infected with the wild-type strain, SG200 (left panel) and the SG200 $\Delta$ see1 mutant (right panel). Similarly to SG200, the mutant causes development of large and numerous tumors.

**(B)** The expression of *See1* was quantified by RT-qPCR to compare leaf, tassel and ear samples 12 dpi after *U. maydis* SG200 infection (for details see Methods). Error bars show SE. \*,  $P \leq 0.001$ .

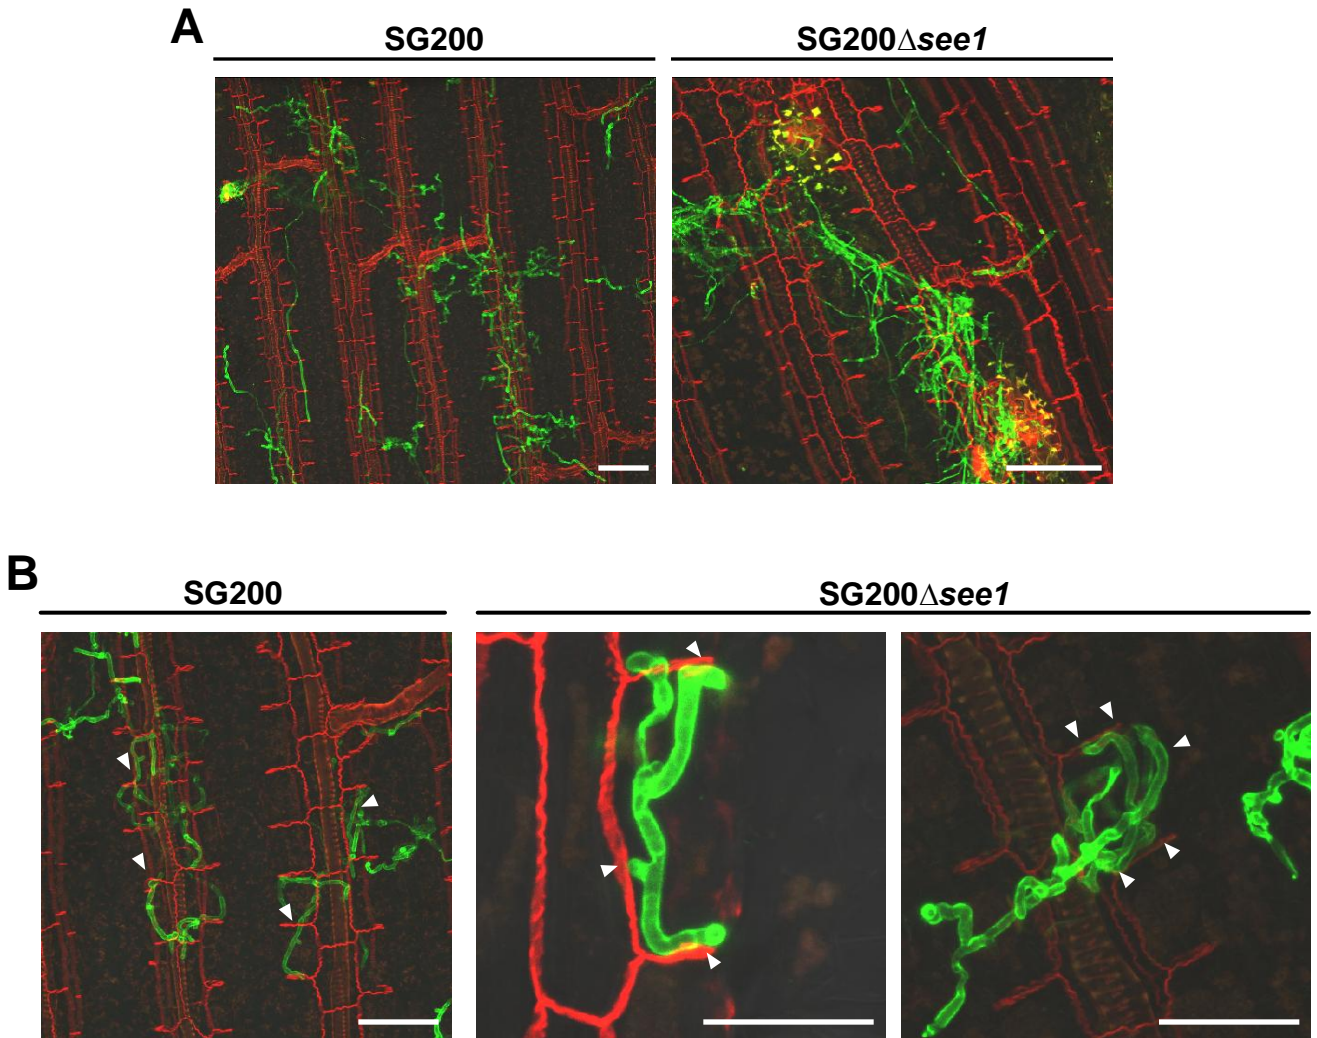

**Supplemental Figure 4. Growth of SG200 $\Delta$ see1 Mutant is Arrested in the Mesophyll and Vascular Cell Layers of Leaves.**

**(A)** Successful penetration and initial establishment of the SG200 $\Delta$ see1 mutant (right panel) in comparison to the wild-type (left panel) at 2 dpi. Bars = 50  $\mu$ m.

**(B)** The wild-type strain SG200 proliferates extensively in the mesophyll and the vascular layers of the leaf. Hyphae pass from one cell to another as indicated by white arrowheads. The hyphae of the SG200 $\Delta$ see1-mutant are often arrested in the initial mesophyll or vascular cells contacted; these hyphae reduced in the ability to pass from cell to cell. The SG200 $\Delta$ see1 hyphae are frequently trapped in individual cells as indicated by the white arrowheads. Bars = 50  $\mu$ m.

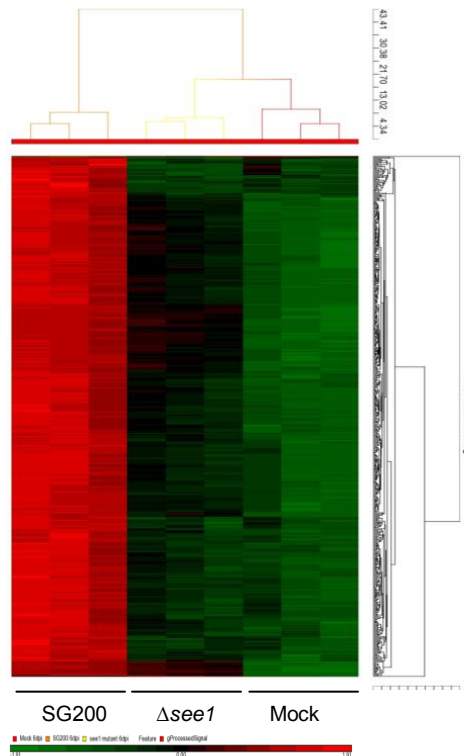

**Supplemental Figure 5. Gene Expression During Maize Colonization with SG200 and SG200Δsee1.**

Plant transcriptome analysis of SG200 (wild-type) and SG200Δsee1 (mutant) infected tissue using microarray hybridization. Hierarchical clustering was performed by the Partek Genomics Suite version 6.12 to visualize expression of maize genes transcriptionally regulated at 6 dpi by *U. maydis* strain SG200 (left), infection by SG200Δsee1 (middle), and mock inoculation (right) . The X-axis depicts clustering of the microarray samples for each of the three biological replicates for each treatment. The Y-axis shows clustering of the regulated maize transcripts based on similarity of their expression patterns. red: upregulated genes; green: downregulated genes; black: not significantly altered.



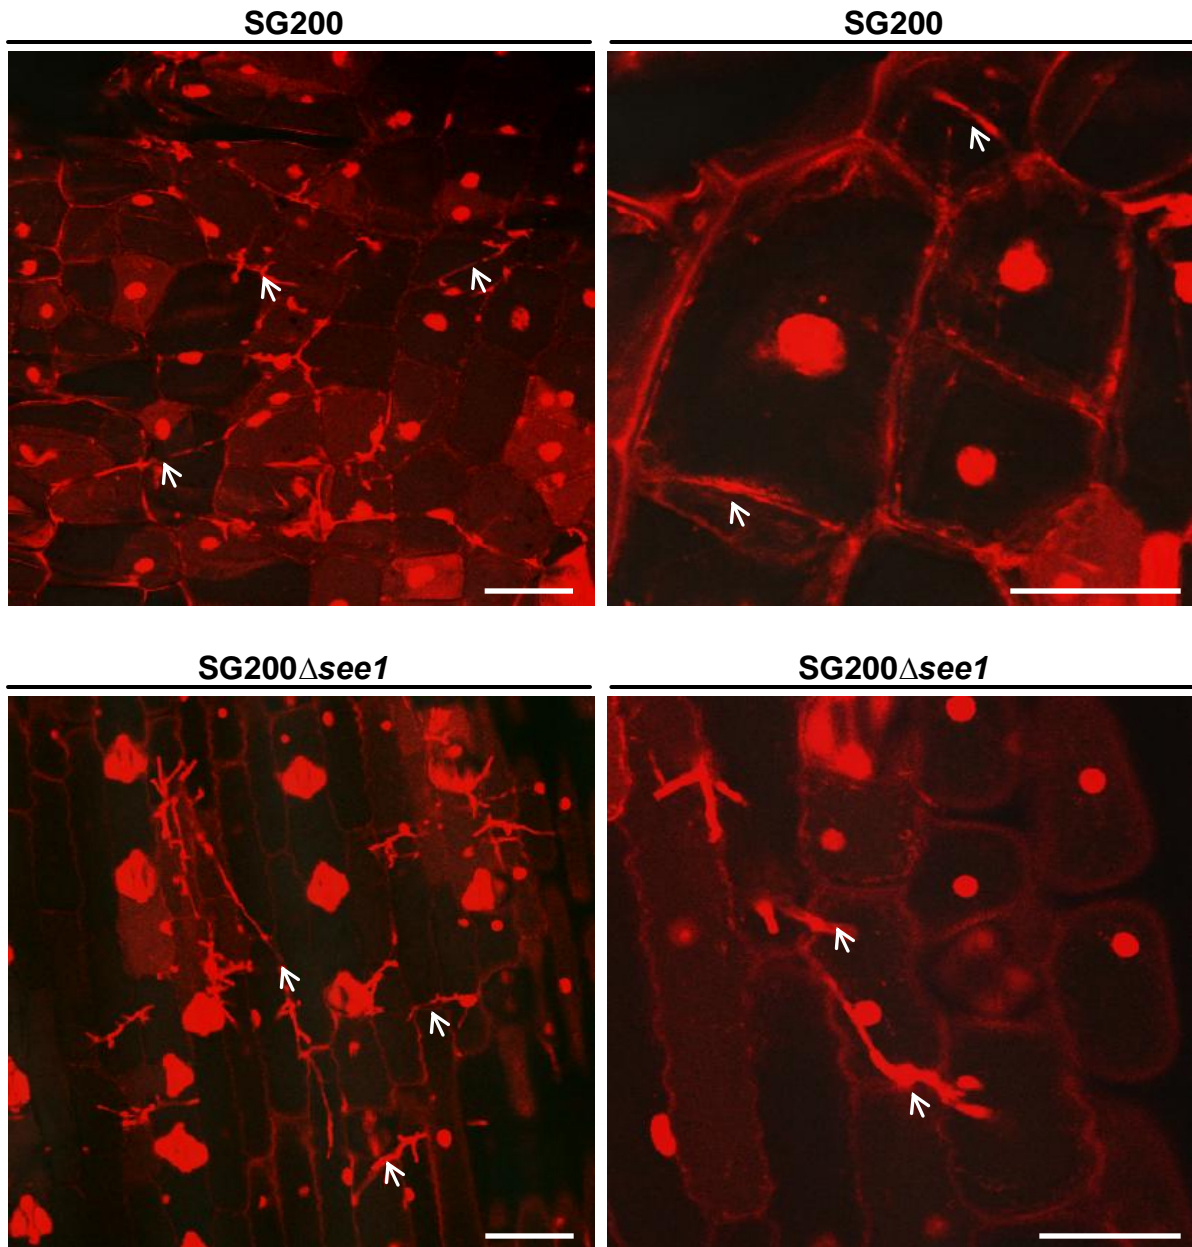

**Supplemental Figure 6. Specificity of the EdU labeling assay.**

Magnified images of the in vivo DNA synthesis assay in seedling tissue infected with SG200 $\Delta$ see1 in comparison to wild-type SG200. DNA synthesis inhibitor hydroxyurea was injected in the infected seedling one day before the EdU treatment. The pretreatment with hydroxyurea did not show any incorporation of EdU. This was also true for the cells infected with the wild-type strain SG200 where some of the cells had already initiated division before the treatment. Fungal hyphae and plant cell walls were visualized by propidium iodide (PI) staining (red), and the EdU labelled host cell nuclei are visualized by AF488 staining (green) which did not show any labeling. The fungal hyphae are marked by the white arrows. Bars = 50  $\mu$ m.

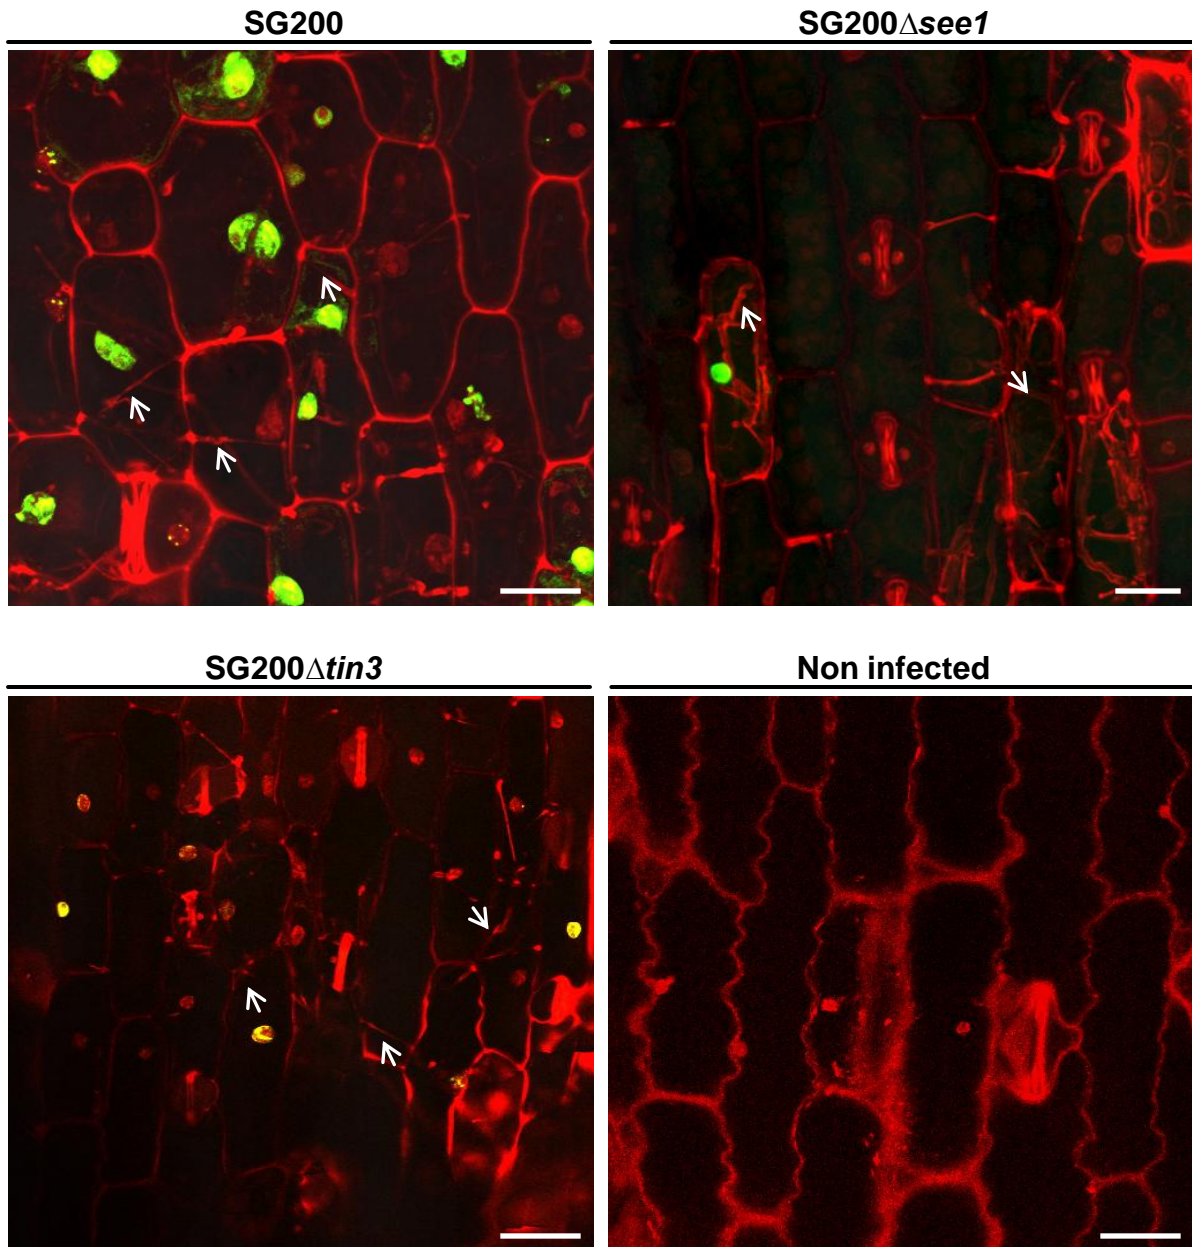

**Supplemental Figure 7. See1 Requirement in Leaf Tumor Formation.**

Magnified images of the in vivo DNA synthesis assay in seedling tissue infected with SG200 $\Delta$ see1 in comparison to wild-type SG200. Sample infected with SG200 $\Delta$ tin3, which has a similar phenotype to SG200 $\Delta$ see1 with respect to tumor size, was used as a control. Non infected sample did not show any DNA synthesis activity. Fungal hyphae and plant cell walls were visualized by propidium iodide (PI) staining (red), and the EdU labelled host cell nuclei are visualized by AF488 staining (green). Non infected samples lacked any DNA synthesis activity. The fungal hyphae are marked by the white arrows. Bars = 25  $\mu$ m.

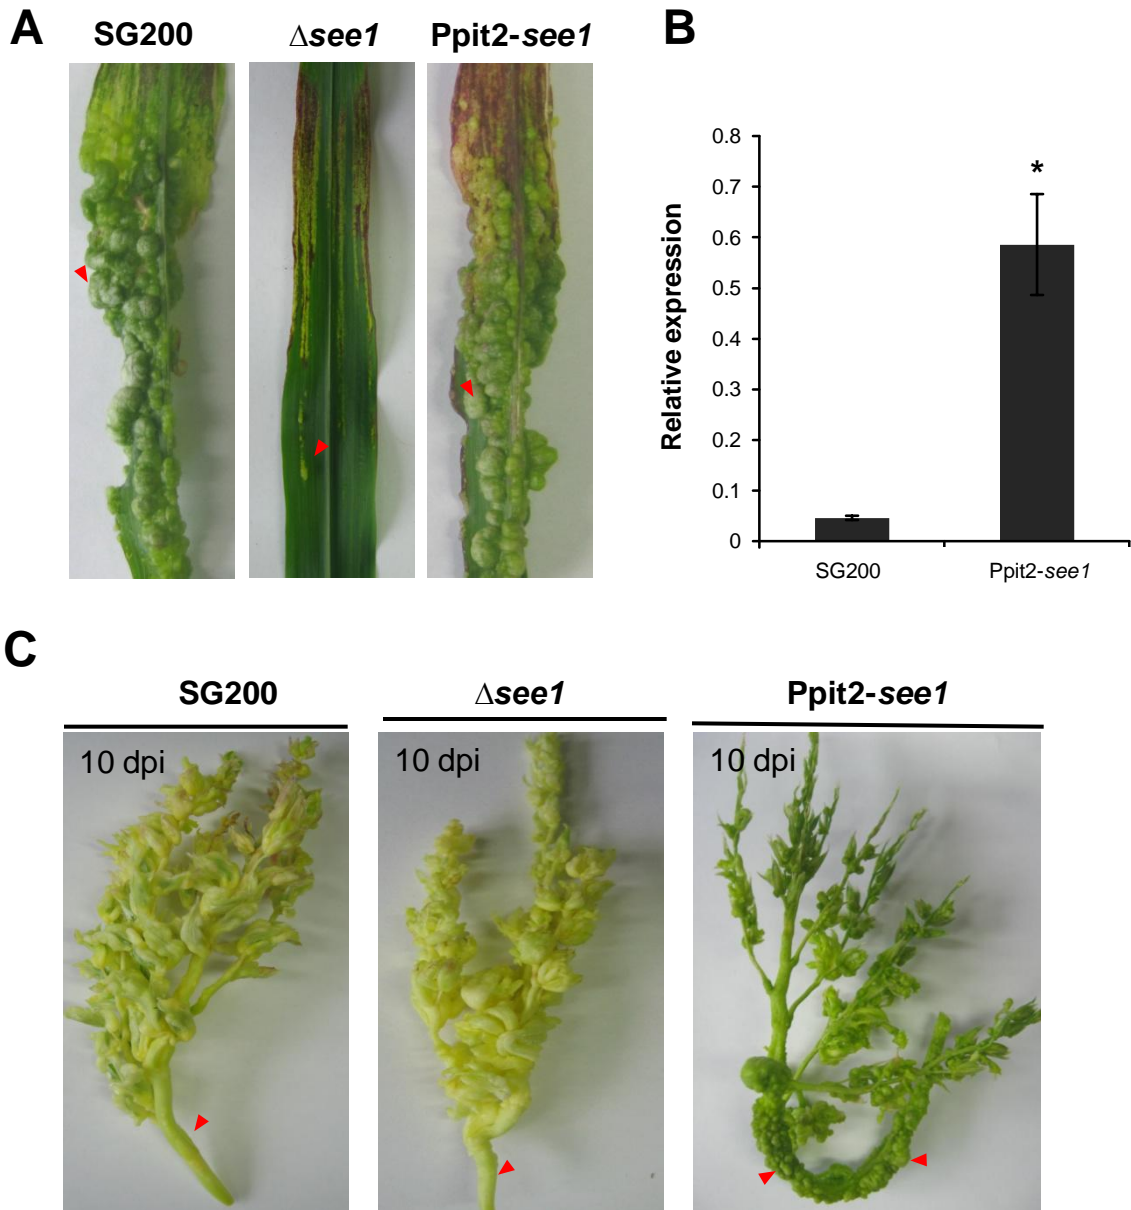

**Supplemental Figure 8. Constitutive Overexpression of See1 Results in Tumors on the Vegetative Parts of Tassels.**

**(A)** Overexpression of See1 in leaf tissues leads to a wild-type phenotype with no further increase in tumor size as compared to the wild-type SG200. The infection symptoms are marked with red arrowheads.

**(B)** qRT-PCR confirmation of overexpression of Ppit2-see1 in seedlings. Error bars show SE. \*,  $P \leq 0.001$ .

**(C)** Tassel base abnormality resulting from constitutive overexpression of See1 is observed only in the vegetative parts of the tassels. The tumor symptoms are shown in comparison with the wild-type strain SG200 and SG200 $\Delta see1$ . The tassels appear to be greenish when see1 is constitutively overexpressed throughout the colonization process. The infection characteristics are marked with red arrowheads.



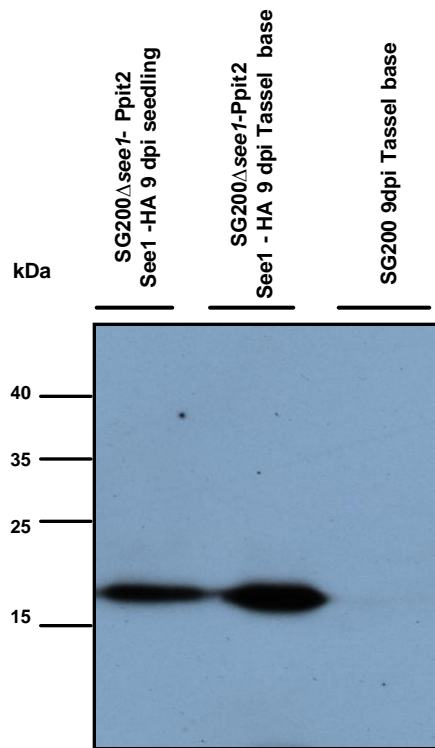

**Supplemental Figure 9. Stable Expression of the Ppit2 overexpressed See1-HA Protein in Infected Seedlings and Tassel base.**

Ppit2 overexpressed See1-HA immuno-precipitated from infected plant tissue displays the expected size of 18.81 kDa. Plants infected with SG200 $\Delta$ see1-Ppit2-see1-HA were subjected to anti-HA immunoprecipitation at 9 dpi in seedling and tassel base samples. The immunoblot was developed with anti-HA mouse antibodies and demonstrates that full length See1-HA is present in SG200 $\Delta$ see1-Ppit2-see1-HA infected tissue whereas no signal can be detected in SG200 infected tassel base which served as negative control.

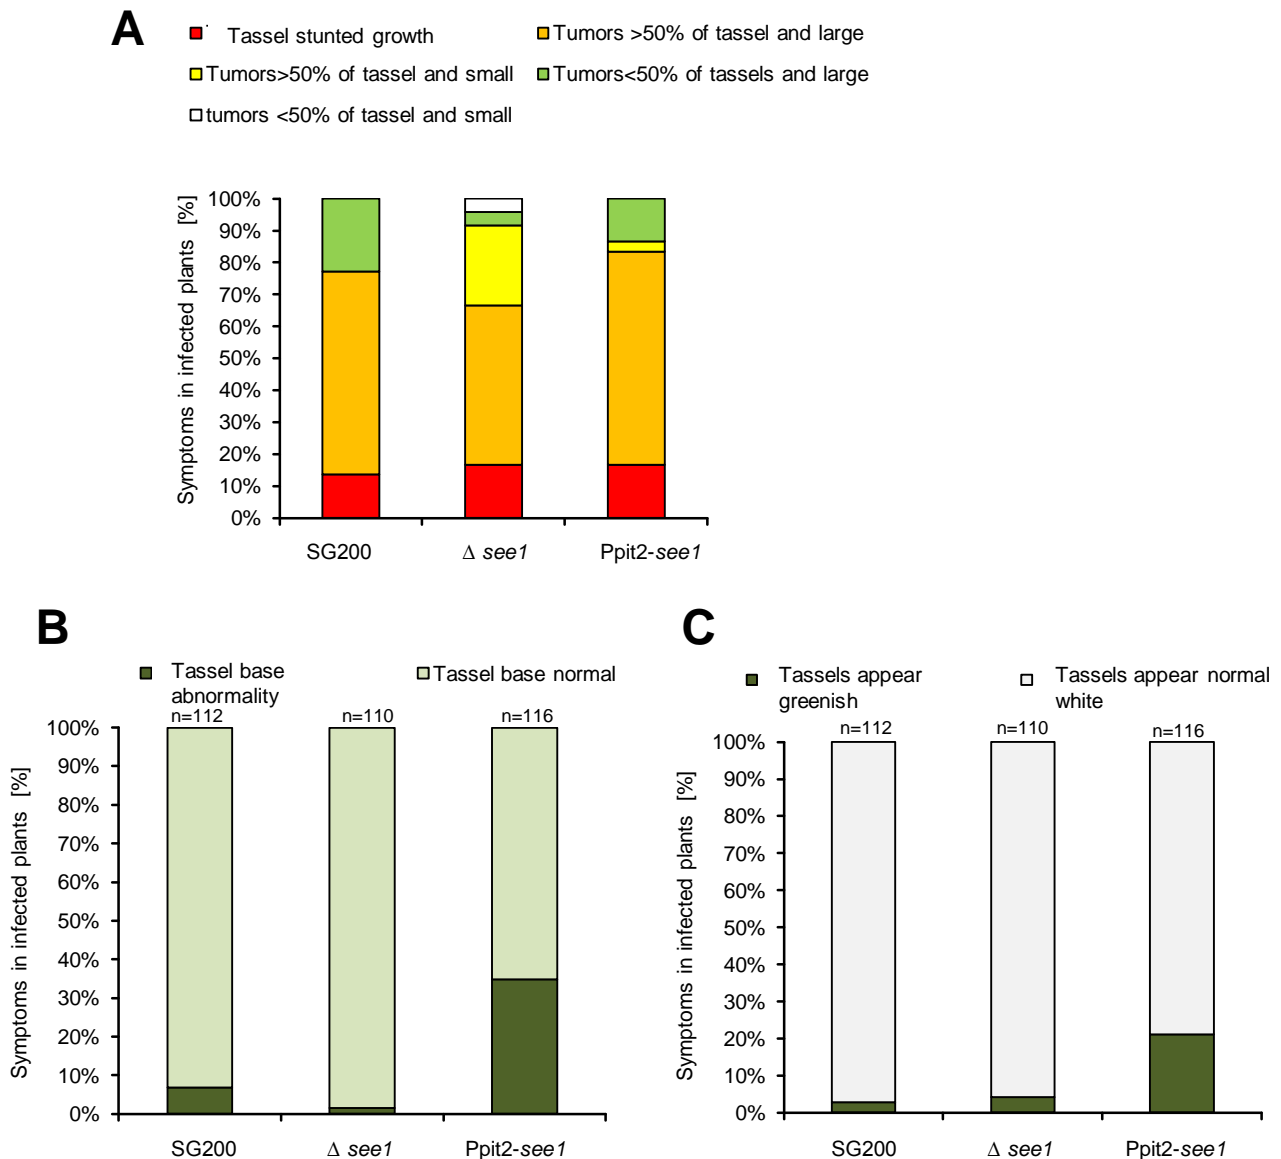

**Supplemental Figure 10. Overexpression of See1 Results in Two Abnormalities in Tassels: Tumors at the Tassel Base and Greenish Tassels.**

**(A)** Disease symptoms of tassels infected with See1 over-expressing strain (Ppit2-see1) in comparison to the wild-type progenitor strain SG200 and SG200 $\Delta see1$ . The symptoms were scored at 14 dpi. The experiment was performed in three independent biological replicates.

**(B)** The tassel base abnormalities in plants infected with the strain over-expressing see1 in comparison to wild-type and the SG200 $\Delta see1$  strain. The symptoms were scored at 14 dpi. The experiment was performed in three independent biological replicates.

**(C)** The greenish appearance of the tassel infected by See1 over-expressing strain was quantified as the number of greenish tassels to the total number of tassels infected. The symptoms were scored at 14 dpi. The experiment was performed in three independent biological replicates.

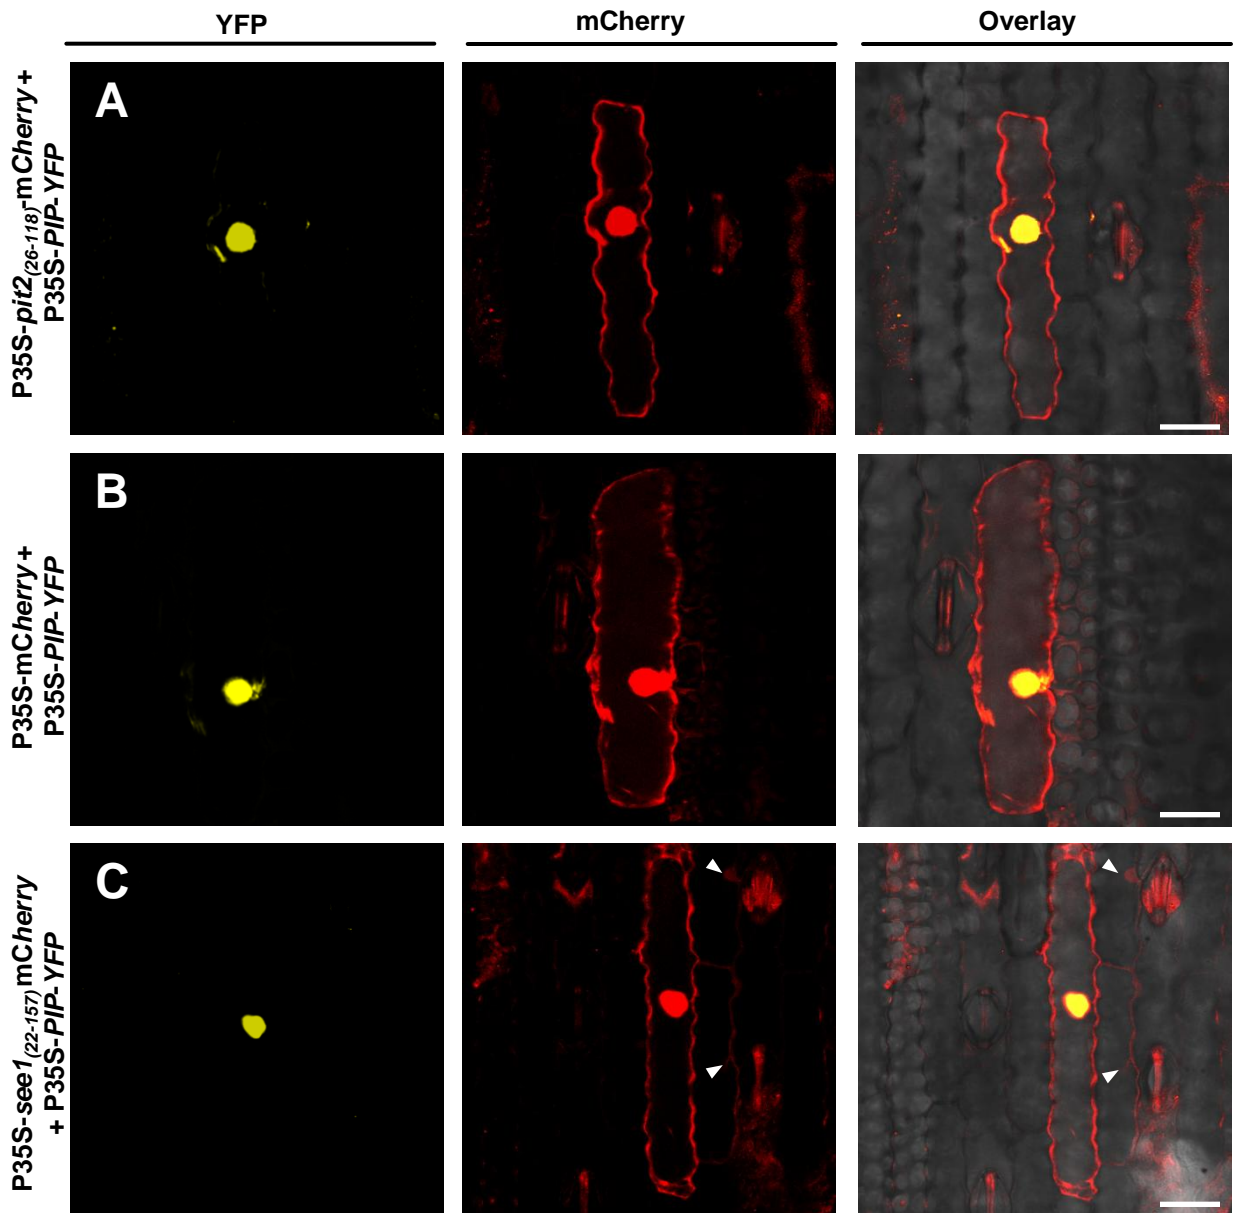

### Supplemental Figure 11. See1 is Transferred to Cells Neighboring to the Transformed Cell.

**(A)** Confocal microscopy of 35S-*pit2*<sub>26-118</sub>-mCherry transiently expressed in maize epidermal cells. The transformed cell (left panel) expresses a PIP-YFP control that is specifically localized to the nucleus. Pit2-mCherry is localized to the cytoplasm and nucleus. Scale bar = 25µm.

**(B)** Confocal microscopy of 35S-mCherry transiently expressed with 35S-PIP-YFP in maize epidermal cells. The PIP-YFP control is specifically localized to the nucleus. mCherry is localized to the cytoplasm and nucleus. Scale bar = 25µm.

**(C)** Transient expression of 35S-*see1*<sub>22-157</sub>-mCherry in maize epidermal cells with nuclear PIP-YFP control. See1-mCherry is localized to the cytoplasm and nucleus and is transferred to the adjacent neighboring cells as shown by white arrowheads. Scale bar = 25µm.

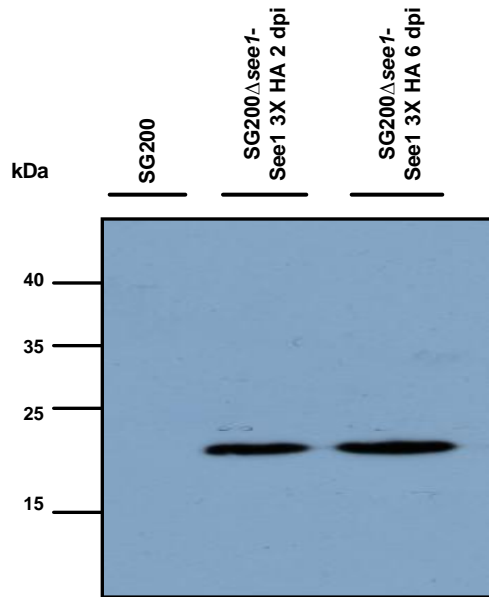

**Supplemental Figure 12. Stable Expression of the See1-3xHA Protein in Infected Tissues.**

See1-3xHA immuno-precipitated from infected plant tissue displays the expected size of 20.98 kDa. Plants infected with SG200 and SG200Δ*see1-see1-3xHA* were subjected to anti-HA immunoprecipitation 2 and 6 dpi. The immunoblot was developed with anti-HA mouse antibodies and demonstrates that full length See1-3xHA is present in SG200Δ*see1-see1-3xHA* infected tissue whereas no signal can be detected in SG200-infected plants.



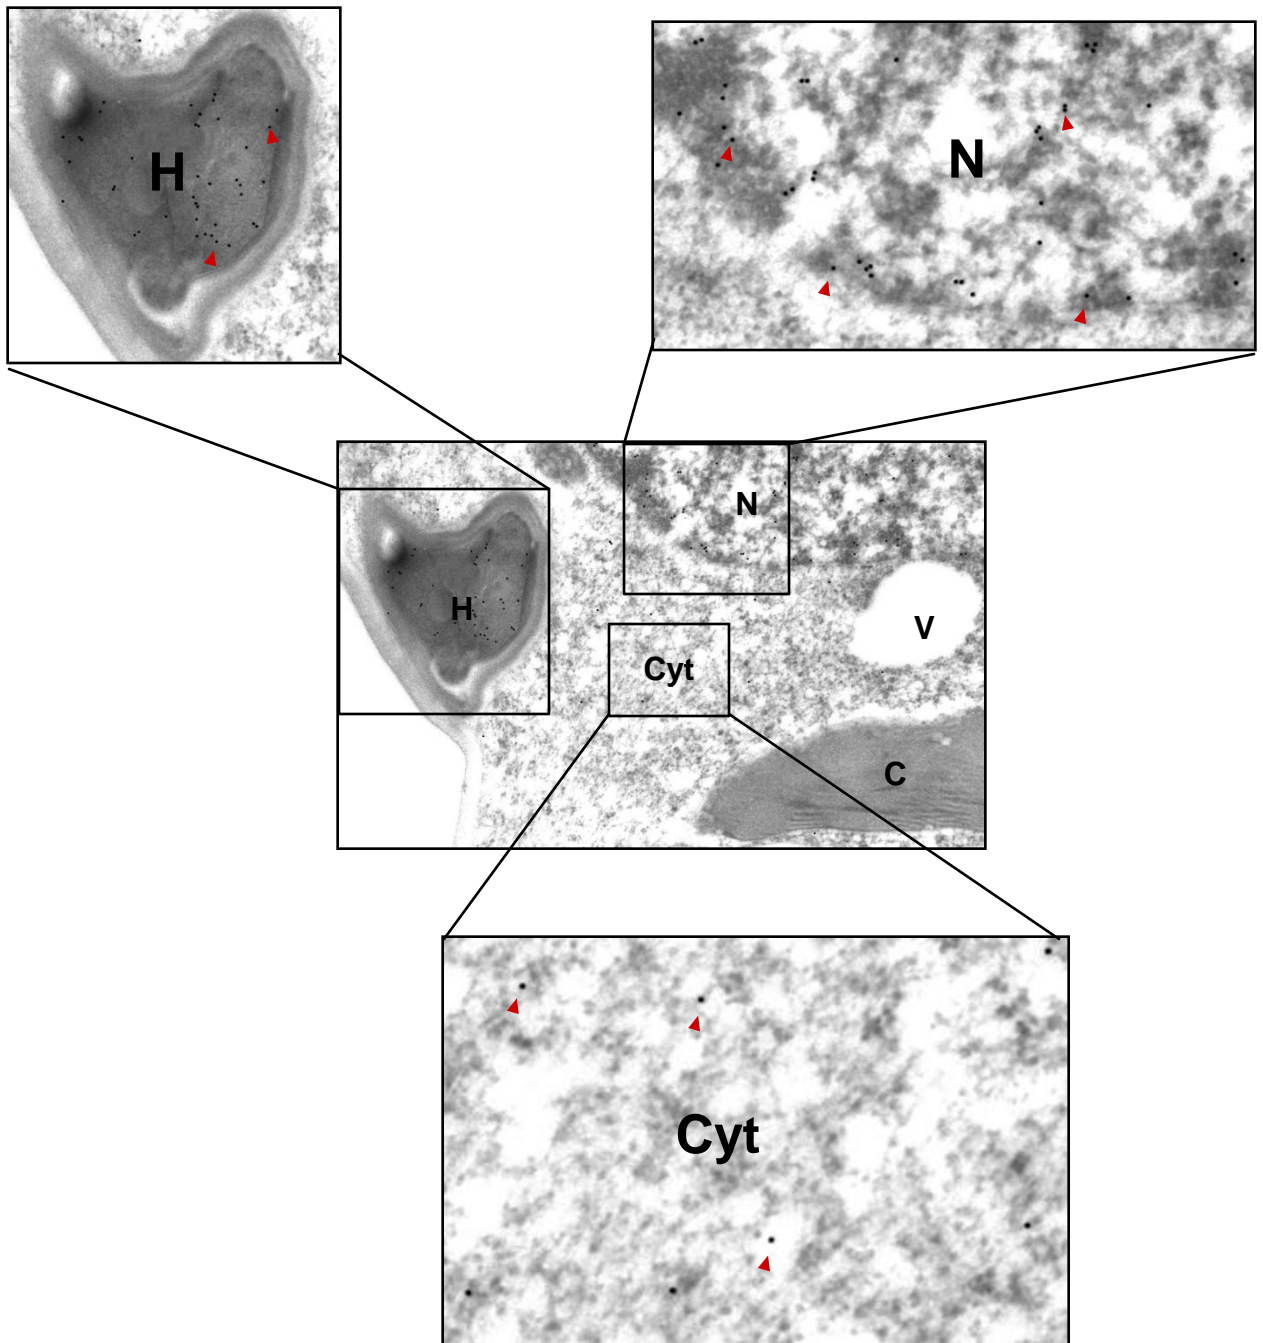

**Supplemental Figure 13. See1 is Translocated to the Plant Cell Cytoplasm and Nucleus.** Immunogold labeling of See1 could be found in hyphae (H), the cytosol (Cyt) and nuclei (N) as shown by the red arrowheads but not in chloroplasts (C), vacuoles (V), or the cell wall (CW) when the See1 effector was tagged with 3xHA in the strain *Psee1-SPsee1-See1-3xHA*.

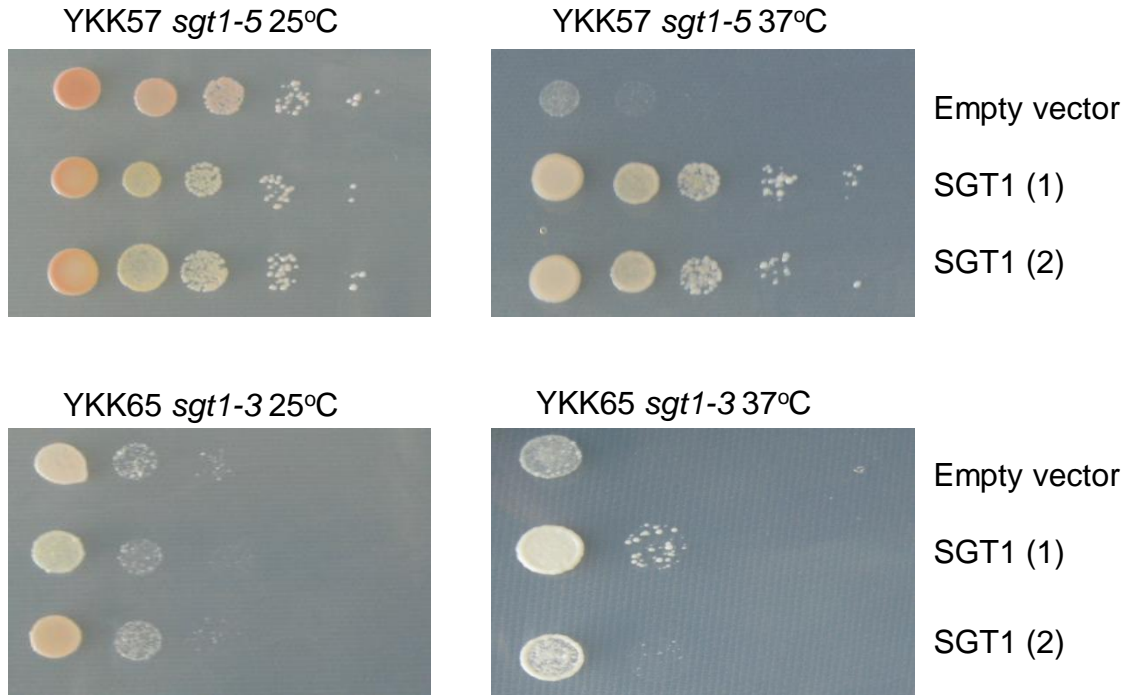

**Supplemental Figure 14. Complementation of two Yeast *sgt1* Cell Cycle Temperature Sensitive Mutants with Maize SGT1.**

Dilution series of yeast strains YKK57 (*sgt1-5*) and YKK65 (*sgt1-3*) complemented with maize SGT1 or empty vector (EV) after growth at the permissive (25°C) and restrictive (37°C) temperatures. Yeast strains were transformed with maize SGT1, (cloned into pGREG GAL), or by an empty vector. The transformants were selected on Sc-Ura 2% glucose plates. The strains were spread on Sc-Ura 2% galactose plates and incubated for 4 days to test the ability of maize SGT1 to complement the temperature-sensitive *sgt1-5* and *sgt1-3* growth defects. The SGT1 (1) and (2) are two independent clones dropped in the assay.

```

Zm-SGT1.1      1 MAASDLESKAKEAFVDDDFELAAELYTQAI DAGPATADLYADRAQAHIKLGNYTEAVADANKAIGLDPTMHKAYYRKGAAICIKLEEYQTA
Nb-SGT1 AY     1 -MASDLEIRAKEAFIDDDHFELAVDLYTQAIAMTPKNAELFADRAQANI KLNIFYTEAVVDANKAIELDPSMSKAYLRKGLACMKLEEYQTA
Nb-SGT1 AF     1 -MASDLETRAKEAFIDDDHFELAVDLYTQAIAMTPKNAELFADRAQANI KLNIFYTEAVVDANKAIELDPSMSKAYLRKGLACMKLEEYQTA

Zm-SGT1.1      91 KAALELGSSYAFGDSRFRTRLLKECDERIADESSQAPAK-----NVEAPVAATVE DKEDVANMDNTPPV----VEPPSKPKYRHDYVNS
Nb-SGT1 AY     90 KAALETGASLAPAE SRFTKLIKECDERIAEEAGELPNQSVDKTSGNVVAPPASESLGNVAVAPKDAQPTVNL SYQGSAAARPKYRHEFYQK
Nb-SGT1 AF     90 KAALETGASLAPAE SRFTKLIKECDERIAEEAGELPNQSVDKTSGNVVAPPASESLGNVAVAPKDAQPTVNL SYQGSAAARPKYRHEFYQK

Zm-SGT1.1      170 ATEVVLTIIYAKGVPADSVVDFGEQMLSVSIEVPGEEPYPHFQPRLF SKIIPKCKYQVLSTKVEIRLAKAEQVTWTTILDYSGRPKAIPQK
Nb-SGT1 AY     180 PEEVVVTIIFAKGIPAKNVIVDFGEQILSVSIDVPGDETYSFQPR LFGKITPAKCRYEVMSTKIEIRLAKAEPLHWTSLEYT-RESAVVQR
Nb-SGT1 AF     180 PEEVVVTIIFAKGIPAKNVVDFGEQILSVSIDVPGDETYSFQPR LFGKITPAKCRYEVMSTKIEIRLAKAEPLHWTSLEYT-RASAVVQR

Zm-SGT1.1      260 ISTPTETAPRPSYPSSKSKK-DWDKLEAEVKKEEKEEKLGDAA LNKFFRDIYKDADEDMRRAMDKSFRESNGTVLSTNWKDVGSKTVEA
Nb-SGT1 AY     269 PNVSSD-APRPSYPSSKLRHTDWDKLEAEVKKEEKEKLGDAA LNKFFRDIYKDADEDIRRAMKSFVESNGTVLSTNWKVEGAKKVEG
Nb-SGT1 AF     269 PNVSSD-APRPSYPSSKLRHVDWDKLEAEVKKEEKEKLGDAA LNKFFRDIYKDADEDIRRAMKSFVESNGTVLSTNWKVEGVTKKVEG

Zm-SGT1.1      349 SPPDGMELKKWEI
Nb-SGT1 AY     358 SPPDGMELKKWEI
Nb-SGT1 AF     358 SPPDGMELKKWEI

```

### Supplemental Figure 15. The Deduced SGT1 Protein Sequences of *Z. mays* and *N. benthamiana* Showing a Multiple Alignment.

Sequence alignment of SGT1 proteins in *Z. mays* and *N. benthamiana* representing the two isoforms 1 and 2. The blue highlight represents identity at the amino acid level which is seen to be 65 % in comparison to the *Z. mays* SGT1.

```

N. tabacum SIPK      1 MDGSGQQTDTMMSDAG---AE---QPPTAPQPVAG----MDNIPATLSHGGRFIQYNI FGNVFEVTAKYKPPVLP IPIGKGAYGIVCSALNSETI-ENVAIKKIANAFDNKI
Z. mays MAP kina    1 MDGGGQPPDTEMSEAG---AGGGGQPPQQPLPVGGGVMLDNIQATLSHGGRFIQYNI FGNVFEVTAKYKPPVLP IPIGKGAYGIVCSAVNSETAAEGGSPKIANAFDNKI
Z. mays unknown     1 MDGGGQPPDTEMTDAGLGGGG---QPPPPPQQPAGGAGMMENIHATLSHGGRFIQYNI FGNVFEVTSKYYKPPVLP IPIGKGAYGIVCSALNSETA-EQVAIKKIANAFDNKI
Z. mays putative    1 MDGGGQPPDTEMSEAG---AGGGGQPPQQPLPVGGGVMLDNIQATLSHGGRFIQYNI FGNVFEVTAKYKPPVLP IPIGKGAYGIVCSALNSETA-EQVAIKKIANAFDNKI
Z. mays ABA stim    1 MDGGGQPPDTEMTDAG---AGGGGQPSFPQQPASGAGM-MENIHATLSHGGRFIQYNI FGNVFEVTSKYYKPPVLP IPIGKGAYGIVCSALNSETA-EQVAIKKIANAFDNKI
Z. mays putative    1 MDGGGQPPDTEMSEAG---AGGGGQPPQQPLPVGGGVMLDNIQATLSHGGRFIQYNI FGNVFEVTAKYKPPVLP IPIGKGAYGIVCSALNSETA-EQVAIKKIANAFDNKI

N. tabacum SIPK      100 DAKRTLREIKLLRMDHENIVAIRDIIPPPQRAAFNDVYIAYELMDTDLHQIIRSNQALSEEHCQYFLYQILRGLKYIHSANVLRDLKPSNLLLNANCDLKICDFGLAR
Z. mays MAP kina    108 DAKRTLREIKLLRMDHENIVAIRDIIPPAQRAAFNDVYIAYELMDTDLHQIIRSNQALSEEHCQYFLYQILRGLKYIHSANVLRDLKPSNLLLNANCDLKICDFGLAR
Z. mays unknown     107 DAKRTLREIKLLRMDHENIVAIRDIIPPLREAFNDVYIAYELMDTDLHQIIRSNQALSEEHCQYFLYQILRGLKYIHSANVLRDLKPSNLLLNANCDLKICDFGLAR
Z. mays putative    107 DAKRTLREIKLLRMDHENIVAIRDIIPPAQRAAFNDVYIAYELMDTDLHQIIRSNQALSEEHCQYFLYQILRGLKYIHSANVLRDLKPSNLLLNANCDLKICDFGLAR
Z. mays ABA stim    106 DAKRTLREIKLLRMDHENIVAIRDIIPPLREAFNDVYIAYELMDTDLHQIIRSNQALSEEHCQYFLYQILRGLKYIHSANVLRDLKPSNLLLNANCDLKICDFGLAR
Z. mays putative    107 DAKRTLREIKLLRMDHENIVAIRDIIPPAQRAAFNDVYIAYELMDTDLHQIIRSNQALSEEHCQYFLYQILRGLKYIHSANVLRDLKPSNLLLNANCDLKICDFGLAR

N. tabacum SIPK      210 VTSETDFMTEYVVRWYRPPPELLNSSDYTAADVWSVGCIFMELMDRKLFPGRDHVHQLRRLMELIGTPNEADLDFVNNENARRYIRQLPCHARQSFPEKFPHVQPLAI
Z. mays MAP kina    218 TTSETDFMTEYVVRWYRAPPELLNSSEYTAADVWSVGCIFMELMDRKLFPGRDHVHQLRRLMELIGTPNEGDLDVFNENARRYIRQLPRHPRQSLPEKFPHVQPLAI
Z. mays unknown     217 TTSETDFMTEYVVRWYRAPPELLNSSEYTAADVWSVGCIFMELMDRKLFPGRDHVHQLRRLMELIGTPNEADLDFVNNENARRYIRQLPCHARQSFPEKFPHVQPLAI
Z. mays putative    217 TTSETDFMTEYVVRWYRAPPELLNSSEYTAADVWSVGCIFMELMDRKLFPGRDHVHQLRRLMELIGTPNEGDLDVFNENARRYIRQLPRHPRQSLPEKFPHVQPLAI
Z. mays ABA stim    216 TTSETDFMTEYVVRWYRAPPELLNSSEYTAADVWSVGCIFMELMDRKLFPGRDHVHQLRRLMELIGTPNEADLDFVNNENARRYIRQLPCHARQSFPEKFPHVQPLAI
Z. mays putative    217 TTSETDFMTEYVVRWYRAPPELLNSSEYTAADVWSVGCIFMELMDRKLFPGRDHVHQLRRLMELIGTPNEGDLDVFNENARRYIRQLPRHPRQSLPEKFPHVQPLAI

N. tabacum SIPK      320 DLVEKMLTFDPRRITVEGALAHPYLNSLHDISDEFCMTPFSDFEQHALTEEQMKELIYRESLAFNPEYQHM
Z. mays MAP kina    328 DLVEKMLTFDPRQRITVEGALAHPYLASLHDISDEPGCSMPFSDFEQHALSEEQMKDLIYQEALAFNPDYQ--
Z. mays unknown     327 DLVEKMLTFDPRQRITVEGALAHPYLASLHDISDEPVCSMPFSDFEQHALSEEQMKDLIYQEALAFNPDYQ--
Z. mays putative    327 DLVEKMLTFDPRQRITVEGALAHPYLASLHDISDEPGCSMPFSDFEQHALSEEQMKDLIYQEALAFNPDYQ--
Z. mays ABA stim    326 DLVEKMLTFDPRQRITVEGALAHPYLASLHDISDEPVCSMPFSDFEQHALSEEQMKDLIYQEALAFNPDYQ--
Z. mays putative    327 DLVEKMLTFDPRQRITVEGALAHPYLASLHDISDEPGCSMPFSDFEQHALSEEQMKDLIYQEALAFNPDYQ--

```

### Supplemental Figure 16. The Deduced SIPK Protein Sequences of *N. tabacum* and a Set of Five putative *Z. mays* SIPK Showing a Multiple Alignment.

Sequence alignment of salicylic acid induced protein kinase (SIPK) from *N. tabacum* aligned to a set of 5 putative SIPK's from *Z. mays*. The blue highlight represents identity at the amino acid level which is seen to be 84-86 % in comparison to the *N. tabacum* SIPK.



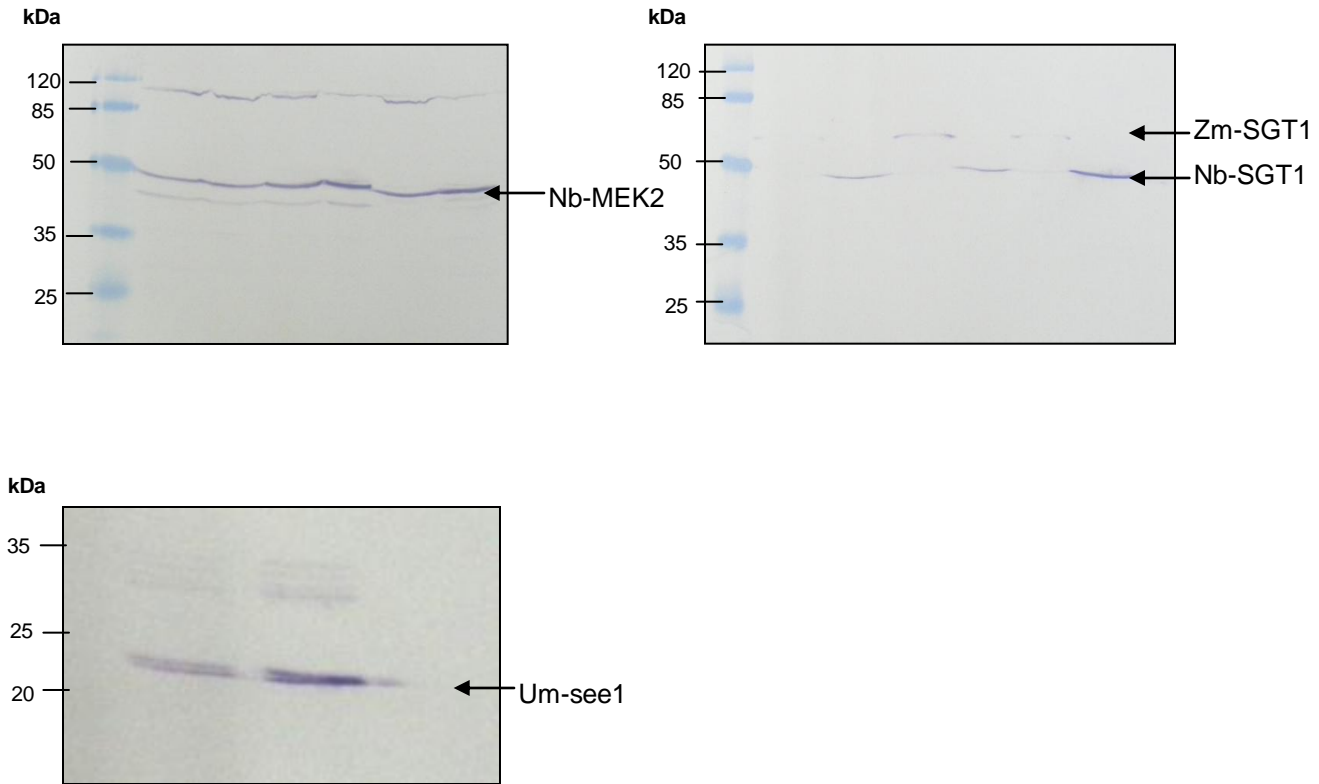

**Supplemental Figure 17. Expression level of the Nt-MEK2, Nb/Zm-SGT1 and Um-See1 Transiently Expressed in *N. benthamiana* Leaves to Assess Zm-SGT1 Phosphorylation In Planta.**

Flag-Nt-MEK2, Nb-SGT1-6xHis-Strep, Zm-SGT1-2xStrep-6xHis and Um-See1-2xStrep-6xHis, were immunodetected with specific anti-Flag or anti-6xHis antibodies in protein extracts from *N. benthamiana* leaf tissue harvested 2 days after agro-infiltration. Bands on the blots correspond to the molecular masses of the full-length proteins, i. e. 42.1 kDa, 43.5 kDa, 46.4 kDa and 24.0 kDa, respectively.

```

Zm-SGT1.1      1 ---MAASDLESKAKEAFVDDDFELAAELTYQAI DAGPATADLYADRAQAHIKLG-NYTEAVADA---NKAIELDPTMHKAYYRKGAAACIKL-----EYQTA---KAALELG---SSYAFGDSRFTRLKKEC
Zm-SGT1.2      1 ---MAASDLESKAKEAFVDDDFELATELYSQAI DAGPATADLYADRAQAHIKLG-NYTEAVADA---NKAIELDPMHKAAYYRKGAAACIKL-----EYQTA---KAALELG---SSYAFGDSRFARLRLKKEC
Sb-SGT1        1 ---MAASDLESKAKEAFVDDDFELAAELTYQAI DAGPATAE LYADRAQAHIKLG-NYTEAVADA---NKAIELDPTMHKAYYRKGAAACIKL-----EYQTA---KAALELG---SSYAFGDSRFTRLKKEC
Os-SGT1        1 MATAAASDLESKAKEAFVDDDFELAAELTYQAI EASPTAE LYADRAQAHIKLG-NYTEAVADA---NKAIELDPSMHKAYLRKGAAACIRL-----EYQTA---KAALELG---YSFASGDSRFTRLKMEC
Hv-SGT1        1 MAAAAASDLESKAKEAFVDDDFELAAELTYQAI EAGPTAE LYADRAQAHIKLG-SYTEAVADA---NKAIELDPSMHKAYLRKGSACIKL-----EYQTA---KAALEVG---SSYAFGDSRFTRLKMEC
Ta-SGT1.1      1 MAAAAASDLESKAKEAFVDDDFELAAELTYQAI EAGPTAE LYADRAQAHIKLG-SYTEAVADA---NKAIELDPSMHKAYLRKGSACIKL-----EYQTA---KAALEVG---SSYAFGDSRFTRLKMEC
Ta-SGT1.2      1 MAAAAASDLESKAKEAFVDDDFELAAELTYQAI EAGPTAE LYADRAQAHIKLG-SYTEAVADA---NKAIELDPSMHKAYLRKGSACIKL-----EYQTA---KAALEVG---SSYAFGDSRFTRLKMEC
Nb-SGT1 AY     1 ---MADLEIRAKEAFIDDFELAVLDITYQAI AMTPFNNAELFADRAQAIIKLN-YFTEAVADA---NKAIELDPSMKAYLRKGLACIKL-----EYQTA---KAALETG---ASLAFASRFITKLIKEC
Nb-SGT1 AF     1 ---MADLEIRAKEAFIDDFELAVLDITYQAI AMTPFNNAELFADRAQAIIKLN-YFTEAVADA---NKAIELDPSMKAYLRKGLACIKL-----EYQTA---KAALETG---ASLAFASRFITKLIKEC
Sc-SGT1        1 M---FVEKDKLTAYKALYDEKPELKAHLHYDEILKGSFNLTALIFRAACLEKLYFGSDSHSDATLAKELDKALMTAEGRSDRSKGLVFNFRYFVHFNIKLYLQASYFKKAKNLYGVDDTLPLNEDLETKLNKK

Zm-SGT1.1      115 DERIAEESQAPAK-----NVE---AP-VA-----A---TVEDEKDVANMDITPP-----VEFPSKPKYRHDYNSATEVLLTIYAKGVADSVVDF-----GEQLSVSIEVP---GEEPYPHFQP
Zm-SGT1.2      115 DERIAEESQAPVK-----NVE---AT-VA-----A---TIEDKEDFTNMDITPP-----IEFPSKPKYRHDYNSATEVLLTIYAKGVADSVVDF-----GEQLSVSIEVP---GEEPYPHFQP
Sb-SGT1        115 EERIAEESQAPVK-----NVE---FP-VA-----AAAATVEDKEDVANMDITPP-----VEFPSKPKYRHDYNSATEVLLTIYAKGVADSVVDF-----GEQLSVSIEVP---GEEPYPHFQP
Os-SGT1        118 DERIAEELTEVFPK-----KAEDGAAAPSVA-----S---FVEEKDDAANMDITPP-----VE---VKPKYRHDYNSATEVLLTIYAKGVADSVVDF-----GEQLSVSIEVP---GEEPYPHFQP
Hv-SGT1        118 DDRIAEEASQAPVK-----NAA---AA-VA FATSSGATTV---V---TEAEDQDGENMENAOPT-----VEVPSKPKYRHDYNTPTTEVLLTIYAKGVADSVVDF-----GEQLSVSIELP---GEEPYPHFQP
Ta-SGT1.1      118 DDRIAEEASQVFPK-----NAA---AA-VA SATSSGASSGATTVA---TEAEDQDGENMENAOPT-----IEVPSKPKYRHDYNTPTTEVLLTIYAKGVADSVVDF-----GEQLSVSIELP---GEEPYPHFQP
Ta-SGT1.2      118 DDRIAEEASQVFPK-----NAA---AA-VA SATSSGASSGATTVA---TEAEDQDGENMENAOPT-----IEVPSKPKYRHDYNTPTTEVLLTIYAKGVADSVVDF-----GEQLSVSIELP---GEEPYPHFQP
Nb-SGT1 AY     114 DERIAEEAGELPNQSVDKTSGNVV---AP-PA-----S---ESLGNVAVAPKDAQPTVNLISY---QGSAAARPKYRHEFYQKPEEVVLLTIYAKGIPAKWVDF-----GEQLSVSVDWP---GDETYSFQP
Nb-SGT1 AF     114 DERIAEEAGELPNQSVDKTSGNVV---AP-PA-----S---ESLGNVAVAPKDAQPTVNLISY---QGSAAARPKYRHEFYQKPEEVVLLTIYAKGIPAKWVDF-----GEQLSVSVDWP---GDETYSFQP
Sc-SGT1        139 NKKQKDSITNKHTIK-----FVE-----SIENRGD---NNSHSHSISPLKIETAPQESPKFKLDWYQSSTSVTISLFTVNLPESEKQVNIYISPNDRRLTISYQVPSKGSSE-FQYNA

Zm-SGT1.1      213 RLFSKIIPEKCKYQVLSTKVEIRLAKAEQVTWITL-----DYSGRPKAIPQKISTEPAITAPRPSYPSSSKAKK-DWDKLEAEVKKEEKEKLEGDGDAALNKFREDIYKDADEDMRRAMMKSFVESNGTVLSTNWK
Zm-SGT1.2      213 RLFSKIIPEKCKYQVLSTKVEIRLAKAEQVTWITL-----DYSGRPKTPVQKISTEPAITAPRPSYPSSSKAKK-DWDKLEAEVKKEEKEKLEGDGDAALNKFREDIYKDADEDMRRAMMKSFVESNGTVLSTNWK
Sb-SGT1        216 RLFAKIIPEKCKYQVLSTKVEIRLAKAEQVTWITL-----DYSGRPKAVPQKISTEPAITAPRPSYPSSSKAKK-DWDKLEAEVKKEEKEKLEGDGDAALNKFREDIYKDADEDMRRAMMKSFVESNGTVLSTNWK
Os-SGT1        219 RLFSKIIPEKSRVQVLSTKVEIRLAKAEQVTWITSL-----DYDKKPKAVPQKIIPPAESRQRPSYPSSSKAKK-DWDKLEAEVKKEEKEKLEGDGDAALNKFREDIYKDADEDMRRAMMKSFVESNGTVLSTNWK
Hv-SGT1        226 RLFSKIVPDKCKYVLTSTKVEIRLAKAEFVWTWISL-----DYTGKPKA-PQKINPFAESRQRPSYPSSSKAKK-DWDKLEAEVKKEEKEKLEGDGDAALNKFREDIYKDADEDMRRAMMKSFVESNGTVLSTNWK
Ta-SGT1.1      230 RLFSKIVPDKCKYVLTSTKVEIRLAKAEFVWTWISL-----DYTGKPKA-PQKINPFAESRQRPSYPSSSKAKK-DWDKLEAEVKKEEKEKLEGDGDAALNKFREDIYKDADEDMRRAMMKSFVESNGTVLSTNWK
Ta-SGT1.2      230 RLFSKIVPDKCKYVLTSTKVEIRLAKAEFVWTWISL-----DYTGKPKA-PQKINPFAESRQRPSYPSSSKAKK-DWDKLEAEVKKEEKEKLEGDGDAALNKFREDIYKDADEDMRRAMMKSFVESNGTVLSTNWK
Nb-SGT1 AY     223 RLFGKITPAKCRHEVMSKRIEIRLAKAEPLHWISL-----EYT-RESAVVQRPNVSSD-APRPSYPSSKLRHVDWDKLEAEVKKEEKEKLEGDGDAALNKFREDIYKDADEDMRRAMMKSFVESNGTVLSTNWK
Nb-SGT1 AF     223 RLFGKITPAKCRHEVMSKRIEIRLAKAEPLHWISL-----EYT-RASAVVQRPNVSSD-APRPSYPSSKLRHVDWDKLEAEVKKEEKEKLEGDGDAALNKFREDIYKDADEDMRRAMMKSFVESNGTVLSTNWK
Sc-SGT1        242 RL SHEVDFKAVSILKIFPKLEILITLKSIDSTQKRLKLEDIITESSRILSEKGNKSDSATRLSASATASKERLSYPPSSKKRIIDWSKLDID-----EAEADEAGSADSFPQKLYAGADPDTKRAMMKSFIESNGTALSTDWE

```

## Supplemental Figure 18. The Deduced SGT1 Protein Sequences with Marked Phosphorylation Sites T<sub>150</sub> and T<sub>262</sub> within Zm-SGT1.

(A) Sequence alignment of SGT1 proteins in various plant species. The blue highlight represents identity at the amino acid level. The phosphorylation sites in the maize SGT1 have been highlighted with red boxes. Both sites lie within variable regions of SGT1 protein. The first site comprising T<sub>150</sub> is conserved in *Z. mays*, *Oryza sativa* and *Sorghum bicolor*. This site might be a specific target for a maize pathogen whereas phosphorylation of the second site seems not to be affected by the pathogen.

**Note:** Maize SGT1 is present in two isoforms, likely coded by duplicate loci; they are named SGT1.1 and SGT1.2. Neither protein has been annotated in the maize genome. We were unable to amplify transcripts of SGT1.2; we conclude that it is not expressed or expressed at very low levels in the organs examined.

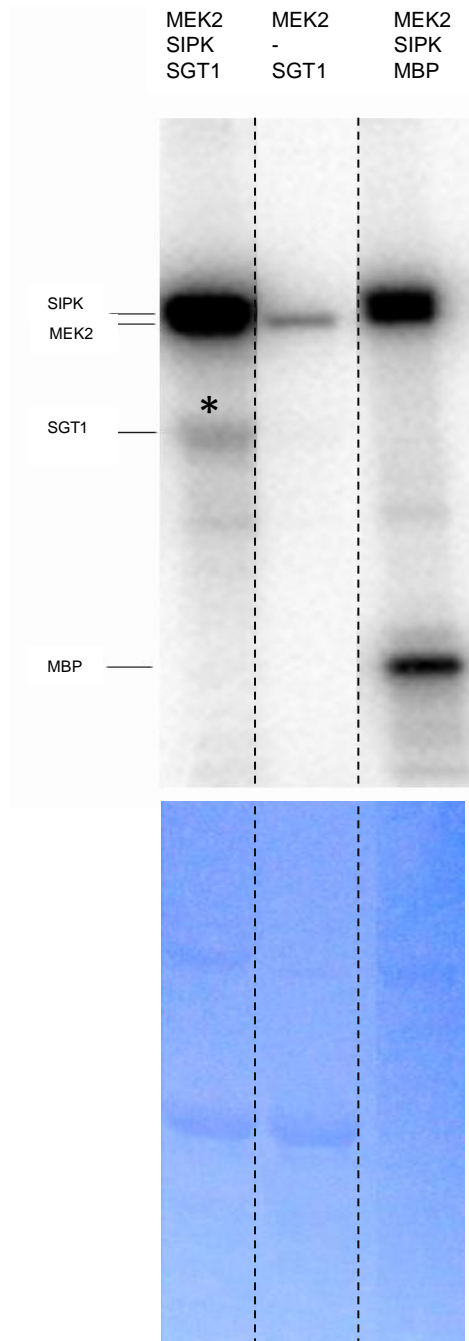

**Supplemental Figure 19. Salicylic Acid Induced Protein Kinase (SIPK) Phosphorylates Maize SGT1 In Vitro.**

Recombinant maize SGT1 with a N-terminal HIS epitope, as well as SIPK and the upstream kinase MEK2 tagged with N-terminal Glutathione S transferase (GST) epitopes, were incubated with [ $^{32}$ P] ATP, resolved by SDS-PAGE and analyzed by autoradiography. Lane 1 and 2 represents SGT1 as a substrate. Lane 3 includes myelin basic protein (MBP) as a positive control. The band corresponding to phosphorylated SGT1 is designated by an asterisk.

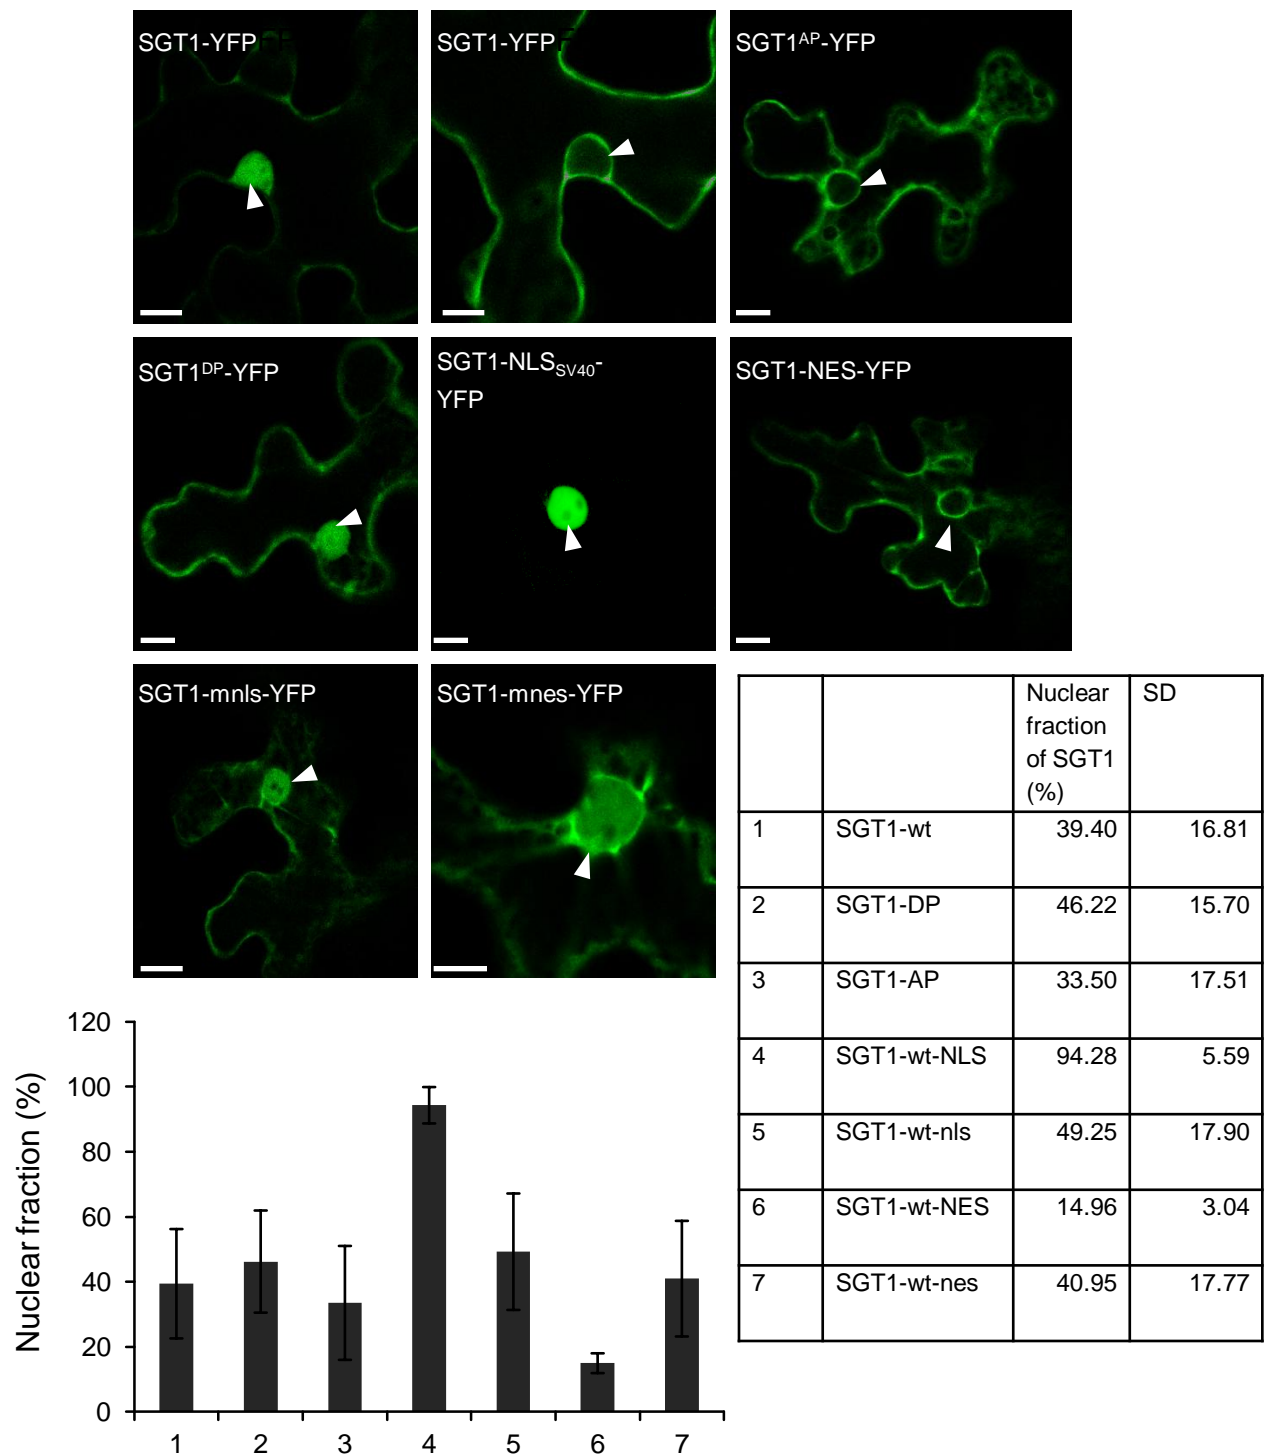

### Supplemental Figure 20. Subcellular Localization of Phospho-variants of Maize SGT1.

Confocal images of representative *N. benthamiana* leaf epidermal cells transiently expressing SGT1-eYFP or the phospho-variants SGT1<sup>AP</sup>-eYFP, SGT1<sup>DP</sup>-eYFP. As a control localization variants of SGT1-3xHA-NLS-eYFP, SGT1-3xHA-NES-eYFP, SGT1-3xHA-nls-eYFP, SGT1-3xHA-nes-eYFP are shown. Arrowheads mark the nuclei. Bars =10  $\mu$ m. Wild-type maize SGT1 accumulates in the cytoplasm and nucleus or exclusively in the cytoplasm (Upper panel; left and middle cell, respectively). Fluorescence intensities in the nucleus (IN) and cytoplasm (IC) were determined by ImageJ software in confocal images of 15 cells for each construct. Percentage of nuclear fluorescence intensity in each cell was calculated according to the formula:  $[IN/(IN+IC)] \times 100$ . Mean relative nuclear ratios (+/- SD) are presented in the table and graph.



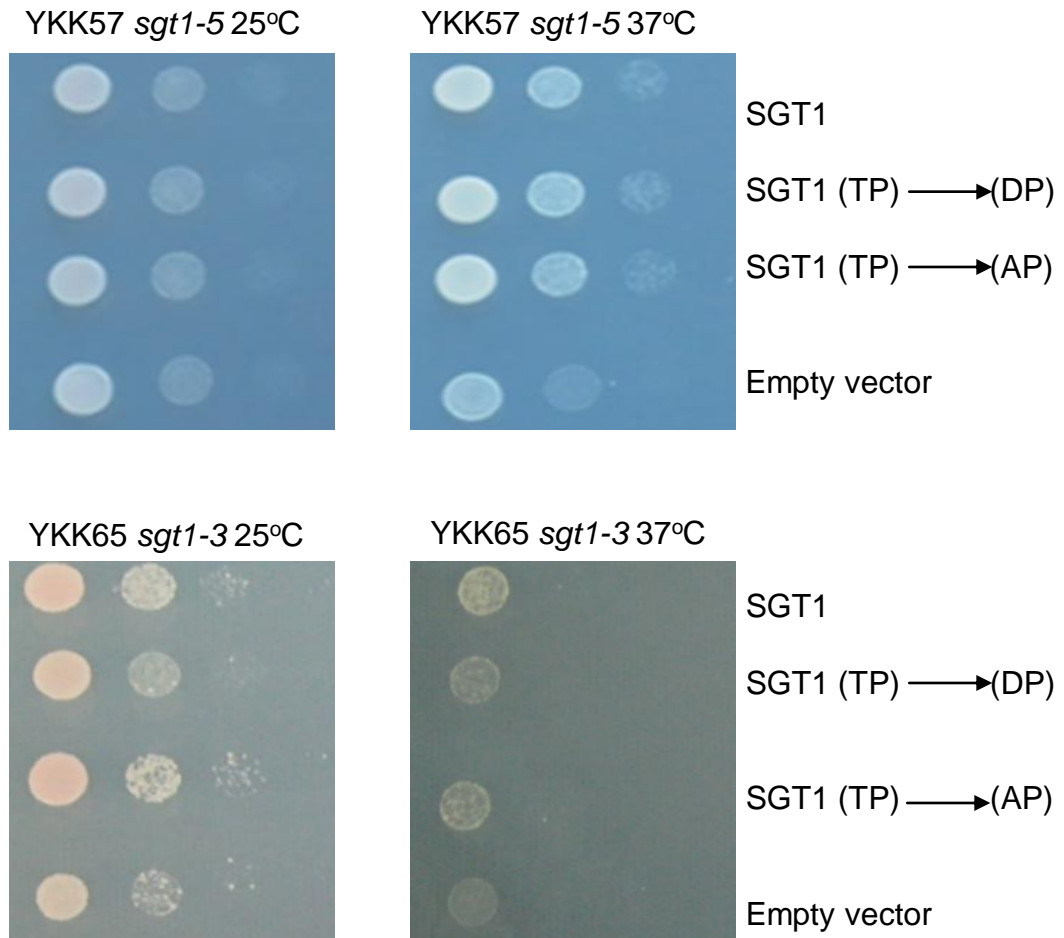

**Supplemental Figure 21. Complementation of Two Yeast *sgt1* Cell Cycle Temperature Sensitive Mutants with Maize SGT1 Wild-type, Phosphomimic and Phosphonull.**

Dilution series of yeast strains YKK57 (*sgt1-5*) and YKK65 (*sgt1-3*) complemented with SGT1, SGT1 phosphomimic (T<sub>150</sub> to D), SGT1 phosphonull (T<sub>150</sub> to A), or empty vector (EV) after growth at the permissive (25°C) and restrictive (37°C) temperatures. Yeast strains were transformed with SGT1, (cloned into pGREG GAL), or by an empty vector. The transformants were selected on Sc-Ura 2% glucose plates. The strains were spread on Sc-Ura 2% galactose plates and incubated for 4 days to test the ability of maize SGT1 to complement the temperature-sensitive *sgt1-5* and *sgt1-3* growth defects.

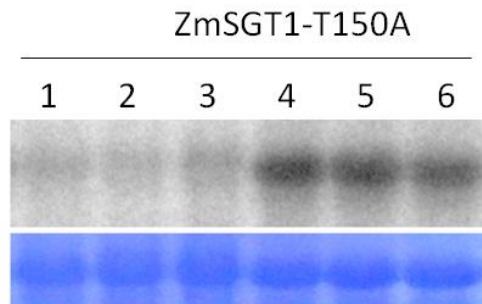

**Supplemental Figure 22. In planta phosphorylation of maize SGT1<sup>AP</sup>.**

Recombinant SGT1<sup>AP</sup> (ZmSGT1 with T150A) produced in *E. coli* was incubated in the buffer containing [ $\gamma^{32}\text{P}$ ] ATP and total proteins extracted from maize seedlings or tassels infected with *U. maydis*. The samples were separated by SDS-PAGE and analyzed with a phosphorimager.

Lanes 1-3: Extracts from seedling leaves 6 dpi infected with: 1- *U. maydis* wild-type SG200; 2, SG200 $\Delta$ see1 ; 3, mock-inoculated; Lanes 4-6: extracts from tassel base 9 dpi infected with 4, *U. maydis* wild-type SG200; 5, *U. maydis* overexpressing Ppit2-See1 (single-copy integration ); 6, *U. maydis* overexpressing Ppit2-See1 (multiple-copy integration).

**Supplemental Table 1.** Differentially Expressed Top 30 GO Terms Related to the DNA Synthesis and Cell Differentiation

| Gene ID  | GO No. | GO Description                                                                                 | Sequence Description                      | Fold change SG200 vs SG200 $\Delta$ see1 |
|----------|--------|------------------------------------------------------------------------------------------------|-------------------------------------------|------------------------------------------|
| CF919894 | 41     | P:cortical microtubule organization; F:hydrolase activity; P:negative regulation of MAP        | dual specificity protein phosphatase pbs1 | 677                                      |
| TC301470 | 20     | P:translational initiation; P:methylation-dependent chromatin silencing; P:cell-cell signaling | protein argonaute 10-like                 | 578                                      |
| TC282828 | 20     | P:cellular response to phosphate starvation; F:phosphatidate phosphatase activity; C:pl        | phytochrome-associated protein 1          | 367                                      |
| TC294593 | 19     | P:myo-inositol transport; F:glucose transmembrane transporter activity; P:mannitol tran        | polyol transporter 5-like                 | 327.425                                  |
| TC307652 | 17     | P:transmembrane transport; P:positive gravitropism; P:leaf formation; C:basal plasma me        | auxin efflux carrier                      | 895.397                                  |
| TC299855 | 17     | P:response to oxidative stress; P:negative regulation of growth; P:oxidation-reduction         | peroxidase 15-like                        | 821.735                                  |
| TC301172 | 17     | P:mitotic cell cycle; P:gene silencing by RNA; F:DNA-dependent ATPase activity; P:respo        | dna repair protein rad51 homolog          | 67.738                                   |
| TC294810 | 15     | F:DNA-directed DNA polymerase activity; F:metal ion binding; P:double-strand break repa        | dna polymerase alpha catalytic subunit    | 403.239                                  |
| TC279595 | 14     | C:cytosol; C:nucleosome; P:response to water deprivation; C:mitochondrion; C:nucleolus;        | histone h4                                | 749.097                                  |
| TC279279 | 14     | C:cytosol; C:nucleosome; P:response to water deprivation; C:mitochondrion; C:nucleolus;        | histone h4                                | 691.187                                  |
| TC279246 | 14     | C:cytosol; C:nucleosome; P:response to water deprivation; C:mitochondrion; C:nucleolus;        | histone h4                                | 541.567                                  |
| TC306450 | 14     | F:glucan exo-1,3-beta-glucosidase activity; F:beta-L-arabinosidase activity; F:cellobio        | beta-glucosidase 44                       | 506.238                                  |
| TC310738 | 13     | P:translation; P:endonucleolytic cleavage to                                                   | 40s ribosomal                             | 417.245                                  |

|          |    |                                                                                         |                                                                             |         |
|----------|----|-----------------------------------------------------------------------------------------|-----------------------------------------------------------------------------|---------|
|          |    | generate mature 3'-end of SSU-rRNA from (S                                              | protein sa                                                                  |         |
| TC307447 | 13 | P:regulation of cell adhesion; P:regulation of cell division; P:protein phosphorylation | leucine-rich repeat receptor-like protein kinase family protein             | 230.113 |
| TC306407 | 13 | C:membrane coat; P:methylation-dependent chromatin silencing; P:chromatin silencing by  | microtubule-associated protein tortifolia1-like                             | 155.289 |
| TC311056 | 13 | P:regulation of G2/M transition of mitotic cell cycle; F:RNA polymerase II carboxy-term | cyclin-dependent kinase b2-1-like                                           | 118.332 |
| TC283433 | 12 | P:microtubule-based process; P:gene silencing; P:histone modification; C:cytoskeletal p | atp binding                                                                 | 747.103 |
| TC287119 | 12 | C:Cajal body; P:histone H3-K9 methylation; P:defense response to bacterium, incompatibl | Argonaute family protein                                                    | 251.56  |
| TC279950 | 11 | P:response to glucose stimulus; P:response to sucrose stimulus; P:response to fructose  | pyrophosphate--fructose 6-phosphate 1-phosphotransferase subunit alpha-like | 674.109 |
| TC294404 | 11 | C:cytoplasm; P:response to nematode; C:plant-type cell wall; P:cell wall modification;  | probable pectinesterase pectinesterase inhibitor 40-like                    | 641.189 |
| TC281806 | 11 | C:plant-type cell wall; F:xylan 1,4-beta-xylosidase activity; P:xyloglucan metabolic pr | alpha-xylosidase 1-like                                                     | 568.093 |
| TC300114 | 10 | F:molecular_function; P:biological_process; P:regulation of transcription, DNA-dependen | ap2-like ethylene-responsive transcription factor at2g41710-like            | 836.606 |
| TC292250 | 10 | P:mitotic cell cycle; P:stomatal lineage progression; P:negative regulation of cyclin-d | cyclin-dependent kinases regulatory                                         | 729.831 |



|          |    |                                                                                         |                                                             |         |
|----------|----|-----------------------------------------------------------------------------------------|-------------------------------------------------------------|---------|
|          |    |                                                                                         | subunit                                                     |         |
| TC300266 | 10 | P:mitotic cell cycle; C:cell wall; F:microtubule binding; C:nucleolus; P:thigmotropism; | microtubule-associated protein rp eb family member 3        | 144.046 |
| TC286934 | 10 | P:meiosis II; P:regulation of cyclin-dependent protein serine/threonine kinase activity | type a-like cyclin                                          | 120.597 |
| TC298222 | 9  | C:nucleosome; P:cell proliferation; F:DNA binding; P:nucleosome assembly; C:nucleus; F: | histone h3                                                  | 862.773 |
| TC298215 | 9  | C:nucleosome; P:cell proliferation; F:DNA binding; P:nucleosome assembly; C:nucleus; F: | histone h3                                                  | 794.373 |
| TC301787 | 7  | P:regulation of transcription, DNA-dependent; F:core promoter binding; P:transcription, | transcription factor pcf3-like                              | 586.847 |
| TC287426 | 7  | P:regulation of cell cycle; F:identical protein binding; P:histone H3-K9 methylation; P | tetratricopeptide repeat-like superfamily protein isoform 1 | 152.837 |
| TC298187 | 7  | C:nucleosome; P:cell proliferation; F:DNA binding; P:nucleosome assembly; C:nucleus; F: | histone h3                                                  | 150.782 |

**Supplemental Table 2.** Oligonucleotides Used in this Study.

| Name                                     | Sequence (5'→3')                                                    | Gene accession No. (NCBI) |                                                                                                                                           |
|------------------------------------------|---------------------------------------------------------------------|---------------------------|-------------------------------------------------------------------------------------------------------------------------------------------|
| OSee1-Sbfl-fw                            | GACCTGCAGGGTGTGCACGGTGCTA<br>CTG                                    | XP_758386<br>(See1)       | Cloning of See1 in p123 for complementation                                                                                               |
| OSee1-NotI-rv                            | GAGCGGCCGCCCCACTCGTGA CTGC<br>TAC                                   |                           |                                                                                                                                           |
| OPpit2_see1-SacII-fw                     | ATACCGCGGATGCTCTTCACCACCTT<br>CGTTTC                                |                           | Cloning of See1 and see1-mCherry in p123-Ppit2 for See1 overexpression                                                                    |
| OPpit2_see1-HA-XbaI-rv                   | CCTCTAGATTAAGCGTAATCTGGAAC<br>ATCGTATGGGTACGTCGTCGGCCCA<br>AATTTATA |                           |                                                                                                                                           |
| OPpit2_see1-mCherry-XbaI-rv              | CGCTCTAGATTACTTGTACAGCTCGT<br>CCA                                   |                           |                                                                                                                                           |
| Osee1_qPCR-fw                            | TCAGGTGCAAGGAGAAGG                                                  |                           | For quantification of see1 expression during biotrophic colonization and also in the individual parts of tassels upon see1 overexpression |
| Osee1_qPCR-rv                            | ACAGAATACTCCGCTTCCC                                                 |                           |                                                                                                                                           |
| Osee1-pGBKT7-NdeI-fw                     | GCGCATATGCATCCTCTACAATCGTT<br>TCG                                   |                           | Construction of pGBKT7-See1 for yeast two hybrid experiments                                                                              |
| Osee1-pGBKT7-BamHI-rv                    | CGCGGATCCTTACGTCGTCGGCCCA<br>AATT                                   |                           |                                                                                                                                           |
| OSee1 <sup>22-157</sup> -mCherry-XbaI-fw | CGCTCTAGAATGCATCCTCTACAATC<br>GTTTCG                                |                           | Cloning of See1 <sup>22-157</sup> in pGreenII 0029 for transient expression in <i>N. benthamiana</i> and <i>Z. mays</i>                   |
| OSee1 <sup>22-157</sup> -mCherry-SacI-rv | CGGGAGCTCTTACTTGTACAGCTCGT<br>CCA                                   |                           |                                                                                                                                           |
| Oppi_qPCR_fw                             | ACATCGTCAAGGCTATCG                                                  | XM_754780.1               | Amplification of the                                                                                                                      |

|                                                       |                                                                                  |                  |                                                                                                                                                     |
|-------------------------------------------------------|----------------------------------------------------------------------------------|------------------|-----------------------------------------------------------------------------------------------------------------------------------------------------|
| Oppi_qPCR_rv                                          | AAAGAACACCGGACTTGG                                                               |                  | housekeeping gene ppi from <i>U. maydis</i> for qPCR                                                                                                |
| Osgt1-pGADT7-NdeI-fw                                  | GTATATACCCGGAATGGAGTACCC<br>ATACGAC                                              | AFW83327 (SGT1)  | For cloning of the ZmSGT1 in pGADT7 for confirmation of the Y2H interaction                                                                         |
| Osgt1-pGADT7-BamHI-rv                                 | GCGCGGATCCTCAAATTTCCCACTTC<br>TTG                                                |                  |                                                                                                                                                     |
| OSee1 <sup>22-</sup><br><sup>157</sup> BamHI- BiFC-fw | GCGCGGATCCATGCATCCTCTACAAT<br>CGTTTC                                             | XP_758386 (See1) | Cloning in the pSPYNE vector for BiFC                                                                                                               |
| OSee1 <sup>22-157</sup> -xhoI-BiFC-rv                 | GACTCGAGCGTCGTCGGCCCAAATT<br>T                                                   |                  |                                                                                                                                                     |
| Osgt1-BamHI-BiFC-fw                                   | GTATGGATCCATGGCCGCGTCGGAT<br>CTG                                                 | AFW83327 (SGT1)  | Cloning in the pSPYCE vector for BiFC                                                                                                               |
| Osgt1-xhoI-BiFC-rv                                    | GCTCTCGAGGATTCCCTGAATGACTT<br>TG                                                 |                  |                                                                                                                                                     |
| OSee1 <sup>22-157</sup> XbaI-fw                       | GCCGGCTCTAGATGCATCCTCTACAA<br>TCGTTTC                                            | XP_758386 (See1) | For in planta Co IP: see1-myc in pGreenII                                                                                                           |
| OSee1 <sup>22-157</sup> -SacI-Myc_rv                  | GGCCGCGAGCTCTTAAAGATCCTCC<br>TCAGAAATCAACTTTTGCTCCGTCGT<br>CGGCCCAAATTTATACTCTCC |                  |                                                                                                                                                     |
| Osgt1-XbaI-fw                                         | CATCTAGATGGCCGCGTCGGATCTG                                                        | AFW83327 (SGT1)  | For in planta Co IP: SGT1-HA in pGreenII                                                                                                            |
| Osgt1-BamHI-HA-rv                                     | CCGGCCGGCGGATCCTTAAGCGTAA<br>TCTGGAACATCGTATGGGTAAATTTCC<br>CCTTCTTGAG           |                  |                                                                                                                                                     |
| Osgt1-pGREG-EcoRI-fw                                  | GCGAGCTCATGCATCCTCTACAATCG<br>TTTCG                                              | AFW83327 (SGT1)  | Cloning of ZmSGT1 into the yeast expression vector pGREG536 with GAL promoter for complementation assay of the yeast cell cycle <i>sgt1</i> mutants |
| Osgt1-pGREG-XhoI-rv                                   | GGCCTCGAGTCAAATTTCCCACTTCT<br>TG                                                 |                  |                                                                                                                                                     |
| OSee1 <sup>22-157</sup><br>pTA7001-SpeI-fw            | GCGCATATGAGCATCGAGCTGTTTCG<br>AG                                                 | XP_758386 (See1) | Cloning of see1 in the DEX inducible pTA7001 vector for                                                                                             |
| OSee1 <sup>22-157</sup>                               | CTCGAGTTAAGCGTAATCTGGAACAT                                                       |                  |                                                                                                                                                     |

|                                             |                                                                                                                                     |                     |                                                                                                                                                                                     |
|---------------------------------------------|-------------------------------------------------------------------------------------------------------------------------------------|---------------------|-------------------------------------------------------------------------------------------------------------------------------------------------------------------------------------|
| pTA7001-Xhol-rv                             | CGTATGGGTACGTCGTCGGCCCAA<br>TTTAT                                                                                                   |                     | <i>in planta</i> phosphorylation assay.                                                                                                                                             |
| OPsee1_see1_3<br>X HA _Sbfl_fw              | GGCCTGCAGGGTGGAGTGAAGCA<br>CAAAAT                                                                                                   | XP_758386<br>(See1) | Cloning of the see1 with the promoter and signal peptide and integrated with 3X HA for immune localization using TEM.                                                               |
| OPsee1_see1_3<br>X HA _NotI_rv              | GCGGCCGCTTAAGCGTAATCTGGAA<br>CATCGTATGGGTAAGCGTAATCTGGA<br>ACATCGTATGGGTAAGCGTAATCTGG<br>AACATCGTATGGGTACGTCGTCGGC<br>CCAAATTTAT    |                     |                                                                                                                                                                                     |
| OPsee1_GFP_3<br>X HA _NcoI_fw               | TACCATGGATGGTGAGCAAGGGCGA<br>GGA                                                                                                    | GFP                 | Cloning of the GFP with the See1 promoter, without the signal peptide and integrated with 3X HA as a control for immune localization using TEM.                                     |
| OPsee1_GFP_3<br>X HA _NotI_fw               | GGGCGGCCGCTTAAGCGTAATCTGG<br>AACATCGTATGGGTAAGCGTAATCTG<br>GAACATCGTATGGGTAAGCGTAATCT<br>GGAACATCGTATGGGTAAGCGTAATCT<br>CTCGTCCATGC |                     |                                                                                                                                                                                     |
| OSPsee1_mcherry_3X<br>HA<br>_NcoI_fw        | CCATGGATGCTCTTCACCACCTTCGT                                                                                                          | SPsee1<br>+mcherry  | Cloning of the mCherry with the See1 secretion signal and integrated with 3X HA as a control for immune localization using TEM. The PCR product was cloned into p123-Psee1 plasmid. |
| OSPsee1_Rv<br>with mcherry<br>overhang      | TCCTCGCCCTTGCTCACCATAGCAGA<br>CACGTGGACAAGAC                                                                                        |                     |                                                                                                                                                                                     |
| Omcherry_fw                                 | ATGGTGAGCAAGGGCGAGGAGGATA                                                                                                           |                     |                                                                                                                                                                                     |
| OPsee1_SPsee1<br>_mcherry_3X HA<br>_NotI_rv | GCGGCCGCTTAAGCGTAATCTGGAA<br>CATCGTATGGGTAAGCGTAATCTGGA<br>ACATCGTATGGGTAAGCGTAATCTGG<br>AACATCGTATGGGTAAGCGTAATCTGG<br>CTCGTCCATGC |                     |                                                                                                                                                                                     |

|                                                                        |                                                |                    |                                                                                                                  |
|------------------------------------------------------------------------|------------------------------------------------|--------------------|------------------------------------------------------------------------------------------------------------------|
| Osgt1_pENTR_D<br>_TOPO_ZmSGT<br>1_fw                                   | CACCATGGCCGCGTCGGATCTGGA                       | AFW83327<br>(SGT1) | For cloning of ZmSGT1 in gateway entry vector and final destination vector pGWB502 for in planta phosphorylation |
| Osgt1_pENTR_D<br>_TOPO_ZmSGT<br>1 (without<br>stop)_rv                 | AATTTCCCACTTCTTGAGCTCC                         |                    | For cloning of ZmSGT1 in gateway entry vector and final destination vector pGWB502 for in planta phosphorylation |
| Osgt1-point<br>mutation-<br>pGREG- -fw                                 | ATGGCCGCGTCGGATCTGGA                           | AFW83327<br>(SGT1) | Additional primer for site directed mutagenesis of ZmSGT1                                                        |
| Osgt1-<br>phosphomimic-<br>T <sub>150</sub> mutated to<br>D-pGREG- -fw | GATGTCGCAAATATGGATAATGACCC<br>GCCAGTGGTAGAACCC | AFW83327<br>(SGT1) | For construction of the phosphomimic Zm-SGT1 for yeast complementation                                           |
| Osgt1-<br>phosphonull-T <sub>150</sub><br>mutated to A-<br>pGREG- -fw  | GATGTCGCAAATATGGATAATGCACC<br>GCCAGTGGTAGAACCC | AFW83327<br>(SGT1) | For construction of the phosphonull Zm-SGT1 for yeast complementation                                            |
| Osgt1- pET15b-<br>NdeI-fw                                              | ATTCATATGGCCGCGTCGGATCTGG<br>A                 | AFW83327<br>(SGT1) | For recombinant Zm-SGT1 in <i>E. coli</i>                                                                        |
| Osgt1- pET15b-<br>BamHI-fw                                             | GGCCGGATCCTCAAATTTCCCACTTC<br>TTGA             | AFW83327<br>(SGT1) | For recombinant Zm-SGT1 in <i>E. coli</i>                                                                        |
| Osgt1_pENTR_D<br>_TOPO_ZmSGT<br>1_point<br>mutation_fw                 | AACCCCAAGCAAACCTAAATATAG                       | AFW83327<br>(SGT1) | Additional primer for site directed mutagenesis of SGT1 on pENTR-D-TOPO for localization studies                 |

|                                                                            |                                  |                    |                                                                                                                        |
|----------------------------------------------------------------------------|----------------------------------|--------------------|------------------------------------------------------------------------------------------------------------------------|
| Osgt1_pENTR_D<br>_TOPO_ZmSGT<br>1_phosphomimic<br>T <sub>150</sub> to D_fw | CTACCACTGGCGGATCATTATCCTAT<br>T  | AFW83327<br>(SGT1) | For construction of the<br>phosphomimic SGT1 in<br>pENTR-D-TOPO for gateway<br>destination for localization<br>studies |
| Osgt1_pENTR_D<br>_TOPO_ZmSGT<br>1_phosphonull<br>T <sub>150</sub> to A_fw  | CTACCACTGGCGGTGCATTATCCATA<br>TT | AFW83327<br>(SGT1) | For construction of the<br>phosphonull SGT1 in<br>pENTR-D-TOPO for gateway<br>destination for localization<br>studies  |



**Supplemental Table 3.** Plasmids Used in the Study.

| Plasmid                                         | Description                                                                                                                          | Reference                   |
|-------------------------------------------------|--------------------------------------------------------------------------------------------------------------------------------------|-----------------------------|
| p123P <sub>see1</sub> see1 <sub>1-157</sub>     | For generation of the complementation strain in the SG200Δsee1 background.                                                           | Schilling et al., 2014      |
| pGreen-P35S-Pit2 <sub>26-118</sub> -mCherry     | For transient expression in maize as shown in Supplemental Figure 10.                                                                | Mueller et al., unpublished |
| p35S-PIP-YFP                                    | For transient expression control in maize which localizes to the nucleus as shown in Figure 6 and Supplemental Figure 10.            | Djamei et al., 2011         |
| pTA7001                                         | For an empty vector control in the in planta phosphorylation assay in <i>N. benthamiana</i>                                          | Aoyama and Chua, 1997       |
| pTA7002-Flag-NtMEK2 <sup>DD</sup>               | For in planta phosphorylation assay                                                                                                  | Yang et al., 2001           |
| pTA7002-Flag-NtMEK2 <sup>KR</sup>               | For in planta phosphorylation assay                                                                                                  | Yang et al., 2001           |
| pROK2                                           | Empty vector control for in planta phosphorylation assay                                                                             | Baulcombe et al., 1986      |
| pROK2-SIPK                                      | For in planta phosphorylation assay                                                                                                  | Hoser et al., 2013          |
| pROK2-NbSGT1-6xHis-StrepII                      | For in planta phosphorylation assay                                                                                                  | Hoser et al., 2013          |
| pGEX-6P1-GST-SIPK                               | For in vitro phosphorylation assay                                                                                                   | Hoser et al., 2013          |
| pGEX-6P2-GST-MEK2 <sup>DD</sup>                 | For in vitro phosphorylation assay                                                                                                   | Hoser et al., 2013          |
| pGWB502-C-SF-TAP                                | Destination vector for Zm-SGT1 for in planta phosphorylation assay                                                                   | Golisz et al., 2013         |
| p123P <sub>pit2</sub> see1 <sub>1-157</sub>     | For generation of the overexpression strain with the constitutive expression of <i>see1</i> in SG200Δsee1 background.                | This Study                  |
| p123P <sub>pit2</sub> see1 <sub>1-157</sub> -HA | For generation of the overexpression strain with the constitutive expression of <i>see1</i> in SG200Δsee1 background with HA epitope | This Study                  |
| p123P <sub>see1</sub>                           | For generation of the electron microscopy                                                                                            | This Study                  |

|                                                           |                                                                                                                          |            |
|-----------------------------------------------------------|--------------------------------------------------------------------------------------------------------------------------|------------|
|                                                           | control strain with SPsee1-m-cherry 3X HA and GFP 3X HA in this plasmid only with See1 promoter                          |            |
| pGBKT7-See1 <sub>22-157</sub>                             | For yeast two hybrid assay shown in Figure 7.                                                                            | This Study |
| pGADT7-ZmSGT1                                             | For yeast two hybrid assay shown in Figure 7.                                                                            | This study |
| pGreen-P35S-See1 <sub>22-157</sub> -mCherry               | For transient expression in maize as shown in Figure 6.                                                                  | This study |
| pGreen-P35S-m-cherry                                      | For transient expression in maize as shown in Supplemental Figure 10.                                                    | This study |
| pTA7001-See1 <sub>22-157</sub> -HA                        | For the in planta phosphorylation assay to induce See1 under DEX promoter                                                | This Study |
| p123-P <sub>see1</sub> -GFP-3X HA                         | As a negative control for electron microscopy with immunogold labeling, without See1 secretion signal                    | This Study |
| p123-P <sub>see1</sub> -SP <sub>see1</sub> -mcherry-3X HA | As a negative control for electron microscopy with immunogold labeling, with See1 secretion signal as shown in Figure 6B | This Study |
| p123-P <sub>see1</sub> -SP <sub>see1</sub> -see1-3X HA    | To localize See1 using TEM immunogold labeling approach as shown in Figure 6C                                            | This Study |
| pGreen_Zmsgt1-HA                                          | For Co-Immunoprecipitation as shown in Figure 7C                                                                         | This Study |
| pGreen_See1 <sub>22-157</sub> -Myc                        | For Co-Immunoprecipitation as shown in Figure 7C                                                                         | This Study |
| pGreen-SPYCE-CFP-See1 <sub>1-157</sub>                    | For Co-Immunoprecipitation as shown in Figure 7C                                                                         | This Study |
| pGreen-SPYCE-CFP-SGT2                                     | For Co-Immunoprecipitation as shown in Figure 7C                                                                         | This Study |

|                                                                             |                                                                                                                                                          |            |
|-----------------------------------------------------------------------------|----------------------------------------------------------------------------------------------------------------------------------------------------------|------------|
| pGreen-SPYCE-CFP with ATG                                                   | Control plasmid for Co-Immunoprecipitation and BiFC                                                                                                      | This Study |
| pGreen-SPYNE-cherry with ATG                                                | Control plasmid for Co-Immunoprecipitation and BiFC                                                                                                      | This Study |
| pGREG536-7XHIS-ZmSGT1                                                       | For complementation of the ZmSGT1 into the yeast cell cycle mutants                                                                                      | This Study |
| pGREG536-7XHIS-ZmSGT1 (phosphomimic where T <sub>150</sub> is mutated to D) | For complementation of the phosphomimic ZmSGT1 into the yeast cell cycle mutants                                                                         | This Study |
| pGREG536-7XHIS-ZmSGT1 (phosponull where T <sub>150</sub> is mutated to A)   | For complementation of the phosponull ZmSGT1 into the yeast cell cycle mutants                                                                           | This Study |
| pET 15b-HIS-Zm-SGT1                                                         | For the recombinant protein production of Zm-SGT1 in <i>E. coli</i> and in vitro phosphorylation assay                                                   | This Study |
| pENTR-D-Topo-ZmSGT1 without stop codon                                      | For cloning of the ZmSGT1 in the pENTR vector and then in the Gateway Compatible Destination vector pGWB502-C-SF-TAP for in planta phosphorylation assay | This Study |
| pGWB502-ZmSGT1_2xStrep_HIS                                                  | For in planta phosphorylation assay                                                                                                                      | This Study |
| pGWB441-ZmSGT1-eYFP                                                         | For in planta subcellular localization observation                                                                                                       | This Study |
| pGWB441-ZmSGT1-eYFP                                                         | For in planta subcellular localization                                                                                                                   | This Study |

|                                                                             |                                                       |            |
|-----------------------------------------------------------------------------|-------------------------------------------------------|------------|
| (phosphomimic where T <sub>150</sub> is mutated to D)                       | observation                                           |            |
| pGWB441-ZmSGT1-eYFP<br>(phosphonull where T <sub>150</sub> is mutated to A) | For in planta subcellular localization<br>observation | This Study |
| pGWB414-ZmSGT1-3xHA-NLS-eYFP                                                | For in planta subcellular localization<br>observation | This Study |
| pGWB414-ZmSGT1-3xHA-nls-eYFP                                                | For in planta subcellular localization<br>observation | This Study |
| pGWB414-ZmSGT1-3xHA-NES-eYFP                                                | For in planta subcellular localization<br>observation | This Study |
| pGWB414-ZmSGT1-3xHA-nes-eYFP                                                | For in planta subcellular localization<br>observation | This Study |

**Supplemental Table 4.** *U. maydis* Strains Used in this Study.

| <b>Strains</b>                             | <b>Genotype</b>                                                                                    | <b>Reference</b>       |
|--------------------------------------------|----------------------------------------------------------------------------------------------------|------------------------|
| SG200                                      | a1mfa2bW2 bE1                                                                                      | Kamper et al., 2006    |
| SG200 $\Delta$ see1                        | a1mfa bW2bE1<br>$\Delta$ um02239::hph                                                              | Schilling et al., 2014 |
| SG200 $\Delta$ see1-see1                   | a1mfa2 bW2bE1<br>$\Delta$ um02239::hph ip <sup>r</sup> [Psee1-see1]ip <sup>s</sup>                 | Schilling et al., 2014 |
| SG200 $\Delta$ tin3                        | a1mfa bW2bE1<br>$\Delta$ um10556::hph                                                              | Brefort et al., 2014   |
| SG200 $\Delta$ see1-Ppit2-see1-HA          | a1mfa2 bW2bE1<br>$\Delta$ um02239::hph ip <sup>r</sup> [Ppit2::see1::HA]ip <sup>s</sup>            | This study             |
| SG200 $\Delta$ see1-Psee1-SPsee1-see1-3XHA | a1mfa2 bW2bE1<br>$\Delta$ um02239::hph<br>ip <sup>r</sup> [Psee1:SPsee1:see1::3XHA]ip <sup>s</sup> | This study             |
| SG200-Psee1-SPsee1-mcherry-3XHA            | a1mfa2 bW2bE1<br>::hph ip <sup>r</sup> [Psee1:SPsee1:mcherry::3XHA]ip <sup>s</sup>                 | This study             |
| SG200-Psee1-GFP-3XHA                       | a1mfa2 bW2bE1<br>::hph ip <sup>r</sup> [Psee1:GFP::3XHA]ip <sup>s</sup>                            | This study             |

## Supplemental Table 5. Peptides Identified by Mass Spectrometry

1) **ZmSGT1 in absence of See1:** There is phosphorylation detected for the highlighted peptides in the variable regions 1 (T<sub>150</sub>) and 2 (T<sub>262</sub>) of the maize SGT1 protein.

# MASCOT Search Results

## Protein View: [gi|670432243](#)

PREDICTED: protein SGT1 homolog [*Zea mays*]

Database: NCBIInr

Score: 15766

Nominal mass (M<sub>r</sub>): 40288

Calculated pI: 4.93

Taxonomy: [Zea mays](#)

This protein sequence matches the following other entries:

- [gi|413950678](#) from [Zea mays](#)

Sequence similarity is available as [an NCBI BLAST search of gi|670432243 against nr.](#)

## Search parameters

MS data file: \\212.87.29.88\Orbita\DO\1401-styczen\40123130krzy\_AR3.raw

Enzyme: Trypsin: cuts C-term side of KR unless next residue is P.

Fixed modifications: [Carbamidomethyl \(C\)](#)

Variable modifications: [Carboxymethyl \(K\)](#), [Oxidation \(M\)](#), [Phospho \(ST\)](#), [Phospho \(Y\)](#)

Protein sequence coverage: 68%



Matched peptides shown in **bold red**.

1 **MAASDLESKA** **KEAFVDDDFE** **LAAELYTQAI** **DAGPATADLY** **ADRAQAHIKL**  
 51 **GNYTEAVADA** **NKAIGLDPTM** **HKAYYRKGAA** **CIKLEEYQTA** **KAALELGSSY**  
 101 **APGDSRFTRL** **LKECDECIAE** **ESSQAPAKNV** **EAPVAATVED** **KEDVANMDNT**  
 151 **PPVVEPPSKP** **KYRHDYNSA** **TEVVLTIYAK** **GVPADSVVID** **FGDQMLSVSI**  
 201 **EVPGEOPYHF** **QPRLFSKIIP** **EKCKYQVLST** **KVEIRLAKAE** **QVTWTTLDYS**  
 251 **GRPKAIPQKI** **STPAETAPRP** **SYPPSSSKKD** **WDKLEAEVKK** **EEKEEKLEGD**  
 301 **AALNKFFRDI** **YKDADEDMRR** **AMDKSFRESN** **GTVLSTNWKD** **VGSKTVEASP**  
 351 **PDGMELKKWE** I

Unformatted sequence string: [361 residues](#) (for pasting into other applications).

Sort peptides by

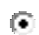

Residue Number

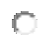

Increasing Mass

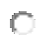

Decreasing Mass

Show predicted peptides also

| Query                | Start - End | Observed  | Mr(expt)  | Mr(calc)  | ppm M   | Score | Expect  | Rank | U | Peptide                                                       |
|----------------------|-------------|-----------|-----------|-----------|---------|-------|---------|------|---|---------------------------------------------------------------|
| <a href="#">3623</a> | 129 - 161   | 872.6876  | 3486.7214 | 3486.7188 | 0.75 1  | 64    | 0.0022  | 1    | U | <b>K.NVEAPVAATVEDKEDVANMDNTPPVVEPPSKPK.Y</b>                  |
| <a href="#">3624</a> | 129 - 161   | 872.6877  | 3486.7217 | 3486.7188 | 0.83 1  | 52    | 0.035   | 1    | U | <b>K.NVEAPVAATVEDKEDVANMDNTPPVVEPPSKPK.Y</b>                  |
| <a href="#">3625</a> | 129 - 161   | 872.6877  | 3486.7217 | 3486.7188 | 0.84 1  | 175   | 1.8e-14 | 1    | U | <b>K.NVEAPVAATVEDKEDVANMDNTPPVVEPPSKPK.Y</b>                  |
| <a href="#">3630</a> | 129 - 161   | 1163.2480 | 3486.7222 | 3486.7188 | 0.96 1  | 177   | 1.3e-14 | 1    | U | <b>K.NVEAPVAATVEDKEDVANMDNTPPVVEPPSKPK.Y</b>                  |
| <a href="#">3636</a> | 129 - 161   | 872.6879  | 3486.7225 | 3486.7188 | 1.07 1  | 72    | 0.00039 | 1    | U | <b>K.NVEAPVAATVEDKEDVANMDNTPPVVEPPSKPK.Y</b>                  |
| <a href="#">3640</a> | 129 - 161   | 872.6880  | 3486.7229 | 3486.7188 | 1.18 1  | 173   | 3.3e-14 | 1    | U | <b>K.NVEAPVAATVEDKEDVANMDNTPPVVEPPSKPK.Y</b>                  |
| <a href="#">3643</a> | 129 - 161   | 698.3520  | 3486.7236 | 3486.7188 | 1.36 1  | 80    | 5.7e-05 | 1    | U | <b>K.NVEAPVAATVEDKEDVANMDNTPPVVEPPSKPK.Y</b>                  |
| <a href="#">3644</a> | 129 - 161   | 872.6882  | 3486.7237 | 3486.7188 | 1.39 1  | 139   | 7e-11   | 1    | U | <b>K.NVEAPVAATVEDKEDVANMDNTPPVVEPPSKPK.Y</b>                  |
| <a href="#">3648</a> | 129 - 161   | 872.6884  | 3486.7245 | 3486.7188 | 1.63 1  | 92    | 3.8e-06 | 1    | U | <b>K.NVEAPVAATVEDKEDVANMDNTPPVVEPPSKPK.Y</b>                  |
| <a href="#">3649</a> | 129 - 161   | 1163.2488 | 3486.7246 | 3486.7188 | 1.65 1  | 175   | 2.1e-14 | 1    | U | <b>K.NVEAPVAATVEDKEDVANMDNTPPVVEPPSKPK.Y</b>                  |
| <a href="#">3653</a> | 129 - 161   | 872.6885  | 3486.7249 | 3486.7188 | 1.76 1  | 159   | 7.8e-13 | 1    | U | <b>K.NVEAPVAATVEDKEDVANMDNTPPVVEPPSKPK.Y</b>                  |
| <a href="#">3654</a> | 129 - 161   | 872.6885  | 3486.7249 | 3486.7188 | 1.76 1  | 189   | 7.8e-16 | 1    | U | <b>K.NVEAPVAATVEDKEDVANMDNTPPVVEPPSKPK.Y</b>                  |
| <a href="#">3785</a> | 129 - 161   | 1168.5827 | 3502.7263 | 3502.7137 | 3.58 1  | 79    | 7.9e-05 | 1    | U | <b>K.NVEAPVAATVEDKEDVANMDNTPPVVEPPSKPK.Y + Oxidation (M)</b>  |
| <a href="#">3786</a> | 129 - 161   | 876.6889  | 3502.7263 | 3502.7137 | 3.59 1  | 138   | 9.1e-11 | 1    | U | <b>K.NVEAPVAATVEDKEDVANMDNTPPVVEPPSKPK.Y + Oxidation (M)</b>  |
| <a href="#">3866</a> | 129 - 161   | 892.6787  | 3566.6857 | 3566.6851 | 0.15 1  | 112   | 6.2e-08 | 1    | U | <b>K.NVEAPVAATVEDKEDVANMDNTPPVVEPPSKPK.Y + Phospho (ST)</b>   |
| <a href="#">3867</a> | 129 - 161   | 892.6787  | 3566.6858 | 3566.6851 | 0.18 1  | 119   | 1.2e-08 | 1    | U | <b>K.NVEAPVAATVEDKEDVANMDNTPPVVEPPSKPK.Y + Phospho (ST)</b>   |
| <a href="#">3868</a> | 129 - 161   | 892.6789  | 3566.6867 | 3566.6851 | 0.43 1  | 97    | 2e-06   | 1    | U | <b>K.NVEAPVAATVEDKEDVANMDNTPPVVEPPSKPK.Y + Phospho (ST)</b>   |
| <a href="#">3869</a> | 129 - 161   | 892.6792  | 3566.6876 | 3566.6851 | 0.68 1  | 62    | 0.0051  | 1    | U | <b>K.NVEAPVAATVEDKEDVANMDNTPPVVEPPSKPK.Y + Phospho (ST)</b>   |
| <a href="#">2742</a> | 260 - 276   | 633.6344  | 1897.8812 | 1897.8822 | -0.53 0 | 105   |         | 1    |   | <b>K.ISTPAETAPRPSYPSSK.S + Phospho (ST); [+30.0106 at A5]</b> |

| Query                | Start - End | Observed | Mr(expt)  | Mr(calc)  | ppm  | M | Score | Expect  | Rank | U | Peptide                                                |
|----------------------|-------------|----------|-----------|-----------|------|---|-------|---------|------|---|--------------------------------------------------------|
| <a href="#">2743</a> | 260 - 276   | 949.9487 | 1897.8829 | 1897.8822 | 0.33 | 0 | 125   |         | 1    |   | K.ISTPAETAPRPSYPSSK.S + Phospho (ST); [+30.0106 at A5] |
| <a href="#">2744</a> | 260 - 276   | 949.9493 | 1897.8840 | 1897.8822 | 0.92 | 0 | 121   |         | 1    |   | K.ISTPAETAPRPSYPSSK.S + Phospho (ST); [+30.0106 at A5] |
| <a href="#">2745</a> | 260 - 276   | 633.6353 | 1897.8840 | 1897.8822 | 0.95 | 0 | 95    |         | 1    |   | K.ISTPAETAPRPSYPSSK.S + Phospho (ST); [+30.0106 at A5] |
| <a href="#">2746</a> | 260 - 276   | 633.6359 | 1897.8857 | 1897.8822 | 1.84 | 0 | 53    |         | 1    |   | K.ISTPAETAPRPSYPSSK.S + Phospho (ST); [+30.0106 at A5] |
| <a href="#">2748</a> | 260 - 276   | 949.9502 | 1897.8859 | 1897.8822 | 1.95 | 0 | 118   |         | 1    |   | K.ISTPAETAPRPSYPSSK.S + Phospho (ST); [+30.0106 at A5] |
| <a href="#">2749</a> | 260 - 276   | 949.9504 | 1897.8862 | 1897.8822 | 2.08 | 0 | 125   |         | 1    |   | K.ISTPAETAPRPSYPSSK.S + Phospho (ST); [+30.0106 at A5] |
| <a href="#">2750</a> | 260 - 276   | 633.6360 | 1897.8862 | 1897.8822 | 2.11 | 0 | 97    |         | 1    |   | K.ISTPAETAPRPSYPSSK.S + Phospho (ST); [+30.0106 at A5] |
| <a href="#">2751</a> | 260 - 276   | 633.6360 | 1897.8863 | 1897.8822 | 2.14 | 0 | 97    |         | 1    |   | K.ISTPAETAPRPSYPSSK.S + Phospho (ST); [+30.0106 at A5] |
| <a href="#">2752</a> | 260 - 276   | 949.9505 | 1897.8863 | 1897.8822 | 2.17 | 0 | 79    |         | 1    |   | K.ISTPAETAPRPSYPSSK.S + Phospho (ST); [+30.0106 at A5] |
| <a href="#">2753</a> | 260 - 276   | 633.6361 | 1897.8864 | 1897.8822 | 2.20 | 0 | 98    |         | 1    |   | K.ISTPAETAPRPSYPSSK.S + Phospho (ST); [+30.0106 at A5] |
| <a href="#">1803</a> | 345 - 357   | 687.3347 | 1372.6548 | 1372.6544 | 0.27 | 0 | 108   | 1.4e-07 | 1    | U | K.TVEASPPDGMEK.K                                       |
| <a href="#">1804</a> | 345 - 357   | 687.3348 | 1372.6550 | 1372.6544 | 0.40 | 0 | 103   | 3.8e-07 | 1    | U | K.TVEASPPDGMEK.K                                       |
| <a href="#">1805</a> | 345 - 357   | 687.3348 | 1372.6551 | 1372.6544 | 0.53 | 0 | 110   | 8.9e-08 | 1    | U | K.TVEASPPDGMEK.K                                       |
| <a href="#">1806</a> | 345 - 357   | 687.3349 | 1372.6553 | 1372.6544 | 0.63 | 0 | 110   | 8.2e-08 | 1    | U | K.TVEASPPDGMEK.K                                       |
| <a href="#">1807</a> | 345 - 357   | 687.3350 | 1372.6555 | 1372.6544 | 0.76 | 0 | 104   | 3.4e-07 | 1    | U | K.TVEASPPDGMEK.K                                       |
| <a href="#">1808</a> | 345 - 357   | 687.3350 | 1372.6555 | 1372.6544 | 0.79 | 0 | 104   | 3.6e-07 | 1    | U | K.TVEASPPDGMEK.K                                       |
| <a href="#">1809</a> | 345 - 357   | 687.3354 | 1372.6562 | 1372.6544 | 1.33 | 0 | 107   | 1.5e-07 | 1    | U | K.TVEASPPDGMEK.K                                       |
| <a href="#">1810</a> | 345 - 357   | 687.3355 | 1372.6564 | 1372.6544 | 1.45 | 0 | 110   | 8.7e-08 | 1    | U | K.TVEASPPDGMEK.K                                       |
| <a href="#">1811</a> | 345 - 357   | 687.3355 | 1372.6565 | 1372.6544 | 1.52 | 0 | 98    | 1.3e-06 | 1    | U | K.TVEASPPDGMEK.K                                       |
| <a href="#">1812</a> | 345 - 357   | 687.3356 | 1372.6567 | 1372.6544 | 1.64 | 0 | 110   | 8.3e-08 | 1    | U | K.TVEASPPDGMEK.K                                       |
| <a href="#">1813</a> | 345 - 357   | 687.3359 | 1372.6572 | 1372.6544 | 2.05 | 0 | 104   | 3.4e-07 | 1    | U | K.TVEASPPDGMEK.K                                       |
| <a href="#">1814</a> | 345 - 357   | 687.3361 | 1372.6577 | 1372.6544 | 2.38 | 0 | 63    | 0.0038  | 1    | U | K.TVEASPPDGMEK.K                                       |
| <a href="#">1815</a> | 345 - 357   | 687.3365 | 1372.6584 | 1372.6544 | 2.91 | 0 | 91    | 5.8e-06 | 1    | U | K.TVEASPPDGMEK.K                                       |
| <a href="#">1816</a> | 345 - 357   | 687.3366 | 1372.6587 | 1372.6544 | 3.14 | 0 | 72    | 0.00049 | 1    | U | K.TVEASPPDGMEK.K                                       |
| <a href="#">1854</a> | 345 - 357   | 695.3324 | 1388.6503 | 1388.6493 | 0.71 | 0 | 67    | 0.0016  | 1    | U | K.TVEASPPDGMEK.K + Oxidation (M)                       |
| <a href="#">1855</a> | 345 - 357   | 695.3325 | 1388.6504 | 1388.6493 | 0.80 | 0 | 59    | 0.0097  | 1    | U | K.TVEASPPDGMEK.K + Oxidation (M)                       |
| <a href="#">1856</a> | 345 - 357   | 695.3325 | 1388.6505 | 1388.6493 | 0.87 | 0 | 94    | 3.1e-06 | 1    | U | K.TVEASPPDGMEK.K + Oxidation (M)                       |
| <a href="#">1857</a> | 345 - 357   | 695.3326 | 1388.6507 | 1388.6493 | 0.96 | 0 | 60    | 0.0086  | 1    | U | K.TVEASPPDGMEK.K + Oxidation (M)                       |
| <a href="#">1858</a> | 345 - 357   | 695.3326 | 1388.6507 | 1388.6493 | 0.96 | 0 | 83    | 4.2e-05 | 1    | U | K.TVEASPPDGMEK.K + Oxidation (M)                       |
| <a href="#">1860</a> | 345 - 357   | 695.3329 | 1388.6513 | 1388.6493 | 1.39 | 0 | 82    | 5.1e-05 | 1    | U | K.TVEASPPDGMEK.K + Oxidation (M)                       |
| <a href="#">1861</a> | 345 - 357   | 695.3330 | 1388.6514 | 1388.6493 | 1.49 | 0 | 84    | 3.6e-05 | 1    | U | K.TVEASPPDGMEK.K + Oxidation (M)                       |
| <a href="#">1862</a> | 345 - 357   | 695.3331 | 1388.6516 | 1388.6493 | 1.61 | 0 | 82    | 4.9e-05 | 1    | U | K.TVEASPPDGMEK.K + Oxidation (M)                       |
| <a href="#">1863</a> | 345 - 357   | 695.3331 | 1388.6516 | 1388.6493 | 1.63 | 0 | 53    | 0.041   | 1    | U | K.TVEASPPDGMEK.K + Oxidation (M)                       |
| <a href="#">1864</a> | 345 - 357   | 695.3331 | 1388.6517 | 1388.6493 | 1.71 | 0 | 83    | 3.8e-05 | 1    | U | K.TVEASPPDGMEK.K + Oxidation (M)                       |
| <a href="#">1866</a> | 345 - 357   | 695.3332 | 1388.6518 | 1388.6493 | 1.75 | 0 | 82    | 5.6e-05 | 1    | U | K.TVEASPPDGMEK.K + Oxidation (M)                       |
| <a href="#">1868</a> | 345 - 357   | 695.3337 | 1388.6529 | 1388.6493 | 2.56 | 0 | 82    | 5.2e-05 | 1    | U | K.TVEASPPDGMEK.K + Oxidation (M)                       |

| Query                | Start - End | Observed | Mr(expt)  | Mr(calc)  | ppm M | Score | Expect | Rank | U | Peptide                             |
|----------------------|-------------|----------|-----------|-----------|-------|-------|--------|------|---|-------------------------------------|
| <a href="#">2115</a> | 345 - 358   | 506.5892 | 1516.7459 | 1516.7443 | 1.071 | 60    | 0.007  | 1    | U | K.TVEASPPDGMEELKK.W + Oxidation (M) |

2) **ZmSGT1 in presence of See1:** There is phosphorylation detected for the highlighted peptides only at the unique site TP in the variable region 2 of the maize SGT1 protein (T<sub>262</sub>).

## MASCOT Search Results

### Protein View: [gi|670432243](#)

PREDICTED: protein SGT1 homolog [*Zea mays*]

Database: NCBIInr  
 Score: 9381  
 Nominal mass (M<sub>r</sub>): 40288  
 Calculated pI: 4.93  
 Taxonomy: [Zea mays](#)

This protein sequence matches the following other entries:

- [gi|413950678](#) from [Zea mays](#)

Sequence similarity is available as [an NCBI BLAST search of gi|670432243 against nr](#).

### Search parameters

MS data file: \\212.87.29.88\Orbita\DO\1401-styczen\40123128krzy\_AR1.raw  
 Enzyme: Trypsin: cuts C-term side of KR unless next residue is P.  
 Fixed modifications: [Carbamidomethyl \(C\)](#)  
 Variable modifications: [Carboxymethyl \(K\)](#), [Oxidation \(M\)](#), [Phospho \(ST\)](#), [Phospho \(Y\)](#)

# Protein sequence coverage: 63%

Matched peptides shown in **bold red**.

1 MAASDLESKA KEAFVDDDFE LA**AELYTQAI** **DAGPATADLY** **ADRAQAHIKL**  
51 **GNYTEAVADA** **NKAIGLDPTM** **HKAYYRKGAA** **CIKLEEYQTA** **KAALELGSSY**  
101 **APGDSRFTRL** LKECDECIAE ESSQAPAK**NV** **EAPVAATVED** **KEDVANMDNT**  
151 **PPVVEPPSKP** KYRHDYNSA TEVVLTIYAK GVPADSVVID FGDQML**SVSI**  
201 **EVPGEOPYHF** **QPRLFSKIIP** EKCK**YQVLST** **KVEIRLAKAE** **QVTWTTLDYS**  
251 **GRPKAIPQKI** **STPAETAPRP** **SYPSSKSKKD** **WDKLEAEVKK** **EEKEEKLEGD**  
301 **AALNKFFRDI** **YKDADEDMRR** AMDKSFRESN **GTVLSTNWKD** VGSK**TVEASP**  
351 **PDGMELK**KWE I

Unformatted sequence string: [361 residues](#) (for pasting into other applications).

Sort peptides by

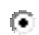

Residue Number

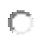

Increasing Mass

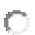

Decreasing Mass

Show predicted peptides also

| Query                | Start - End | Observed  | Mr(expt)  | Mr(calc)  | ppm   | M | Score | Expect  | Rank | U | Peptide                                                    |
|----------------------|-------------|-----------|-----------|-----------|-------|---|-------|---------|------|---|------------------------------------------------------------|
| <a href="#">3719</a> | 129 - 159   | 816.4016  | 3261.5771 | 3261.5711 | 1.85  | 1 | 78    |         | 1    | U | <b>K.NVEAPVAATVEDKEDVANMDNTPPVVEPPSK.P</b>                 |
| <a href="#">3732</a> | 129 - 159   | 1093.5333 | 3277.5781 | 3277.5660 | 3.68  | 1 | 90    |         | 1    | U | <b>K.NVEAPVAATVEDKEDVANMDNTPPVVEPPSK.P + Oxidation (M)</b> |
| <a href="#">3798</a> | 129 - 161   | 1163.2436 | 3486.7090 | 3486.7188 | -2.82 | 1 | 183   | 3.6e-15 | 1    | U | <b>K.NVEAPVAATVEDKEDVANMDNTPPVVEPPSKPK.Y</b>               |
| <a href="#">3799</a> | 129 - 161   | 1163.2448 | 3486.7126 | 3486.7188 | -1.79 | 1 | 173   | 3.2e-14 | 1    | U | <b>K.NVEAPVAATVEDKEDVANMDNTPPVVEPPSKPK.Y</b>               |
| <a href="#">3800</a> | 129 - 161   | 698.3500  | 3486.7136 | 3486.7188 | -1.50 | 1 | 146   | 1.7e-11 | 1    | U | <b>K.NVEAPVAATVEDKEDVANMDNTPPVVEPPSKPK.Y</b>               |
| <a href="#">3802</a> | 129 - 161   | 698.3503  | 3486.7153 | 3486.7188 | -1.02 | 1 | 140   | 5.8e-11 | 1    | U | <b>K.NVEAPVAATVEDKEDVANMDNTPPVVEPPSKPK.Y</b>               |
| <a href="#">3803</a> | 129 - 161   | 698.3503  | 3486.7153 | 3486.7188 | -1.02 | 1 | 156   | 1.7e-12 | 1    | U | <b>K.NVEAPVAATVEDKEDVANMDNTPPVVEPPSKPK.Y</b>               |
| <a href="#">3805</a> | 129 - 161   | 698.3504  | 3486.7157 | 3486.7188 | -0.90 | 1 | 163   | 3.5e-13 | 1    | U | <b>K.NVEAPVAATVEDKEDVANMDNTPPVVEPPSKPK.Y</b>               |
| <a href="#">3807</a> | 129 - 161   | 872.6863  | 3486.7163 | 3486.7188 | -0.72 | 1 | 131   | 4.9e-10 | 1    | U | <b>K.NVEAPVAATVEDKEDVANMDNTPPVVEPPSKPK.Y</b>               |
| <a href="#">3808</a> | 129 - 161   | 872.6865  | 3486.7168 | 3486.7188 | -0.57 | 1 | 123   | 3.2e-09 | 1    | U | <b>K.NVEAPVAATVEDKEDVANMDNTPPVVEPPSKPK.Y</b>               |
| <a href="#">3809</a> | 129 - 161   | 872.6865  | 3486.7170 | 3486.7188 | -0.53 | 1 | 101   | 4.7e-07 | 1    | U | <b>K.NVEAPVAATVEDKEDVANMDNTPPVVEPPSKPK.Y</b>               |
| <a href="#">3810</a> | 129 - 161   | 872.6866  | 3486.7172 | 3486.7188 | -0.47 | 1 | 137   | 1.4e-10 | 1    | U | <b>K.NVEAPVAATVEDKEDVANMDNTPPVVEPPSKPK.Y</b>               |
| <a href="#">3811</a> | 129 - 161   | 872.6866  | 3486.7172 | 3486.7188 | -0.47 | 1 | 133   | 3.5e-10 | 1    | U | <b>K.NVEAPVAATVEDKEDVANMDNTPPVVEPPSKPK.Y</b>               |
| <a href="#">3812</a> | 129 - 161   | 872.6867  | 3486.7178 | 3486.7188 | -0.30 | 1 | 159   | 7.9e-13 | 1    | U | <b>K.NVEAPVAATVEDKEDVANMDNTPPVVEPPSKPK.Y</b>               |
| <a href="#">3813</a> | 129 - 161   | 872.6868  | 3486.7182 | 3486.7188 | -0.17 | 1 | 182   | 4.1e-15 | 1    | U | <b>K.NVEAPVAATVEDKEDVANMDNTPPVVEPPSKPK.Y</b>               |
| <a href="#">3817</a> | 129 - 161   | 872.6872  | 3486.7195 | 3486.7188 | 0.21  | 1 | 157   | 1.3e-12 | 1    | U | <b>K.NVEAPVAATVEDKEDVANMDNTPPVVEPPSKPK.Y</b>               |

| Query                | Start - End | Observed  | Mr(expt)  | Mr(calc)  | ppm  | M | Score | Expect  | Rank | U | Peptide                                               |
|----------------------|-------------|-----------|-----------|-----------|------|---|-------|---------|------|---|-------------------------------------------------------|
| <a href="#">3818</a> | 129 - 161   | 872.6872  | 3486.7196 | 3486.7188 | 0.23 | 1 | 126   | 1.4e-09 | 1    | U | K.NVEAPVAATVEDKEDVANMDNTPPVVEPPSKPK.Y                 |
| <a href="#">3820</a> | 129 - 161   | 698.3513  | 3486.7199 | 3486.7188 | 0.30 | 1 | 156   | 1.5e-12 | 1    | U | K.NVEAPVAATVEDKEDVANMDNTPPVVEPPSKPK.Y                 |
| <a href="#">3821</a> | 129 - 161   | 872.6873  | 3486.7200 | 3486.7188 | 0.33 | 1 | 134   | 2.4e-10 | 1    | U | K.NVEAPVAATVEDKEDVANMDNTPPVVEPPSKPK.Y                 |
| <a href="#">3822</a> | 129 - 161   | 698.3513  | 3486.7201 | 3486.7188 | 0.38 | 1 | 125   | 1.8e-09 | 1    | U | K.NVEAPVAATVEDKEDVANMDNTPPVVEPPSKPK.Y                 |
| <a href="#">3823</a> | 129 - 161   | 872.6873  | 3486.7202 | 3486.7188 | 0.40 | 1 | 138   | 9.7e-11 | 1    | U | K.NVEAPVAATVEDKEDVANMDNTPPVVEPPSKPK.Y                 |
| <a href="#">3824</a> | 129 - 161   | 1163.2475 | 3486.7207 | 3486.7188 | 0.53 | 1 | 194   | 2.5e-16 | 1    | U | K.NVEAPVAATVEDKEDVANMDNTPPVVEPPSKPK.Y                 |
| <a href="#">3893</a> | 129 - 161   | 876.6878  | 3502.7220 | 3502.7137 | 2.37 | 1 | 115   | 2e-08   | 1    | U | K.NVEAPVAATVEDKEDVANMDNTPPVVEPPSKPK.Y + Oxidation (M) |
| <a href="#">3895</a> | 129 - 161   | 876.6880  | 3502.7229 | 3502.7137 | 2.61 | 1 | 130   | 5.8e-10 | 1    | U | K.NVEAPVAATVEDKEDVANMDNTPPVVEPPSKPK.Y + Oxidation (M) |
| <a href="#">3896</a> | 129 - 161   | 1168.5830 | 3502.7272 | 3502.7137 | 3.84 | 1 | 130   | 6e-10   | 1    | U | K.NVEAPVAATVEDKEDVANMDNTPPVVEPPSKPK.Y + Oxidation (M) |
| <a href="#">3898</a> | 129 - 161   | 1168.5850 | 3502.7332 | 3502.7137 | 5.55 | 1 | 144   | 2.5e-11 | 1    | U | K.NVEAPVAATVEDKEDVANMDNTPPVVEPPSKPK.Y + Oxidation (M) |
| <a href="#">2212</a> | 260 - 276   | 606.9800  | 1817.9180 | 1817.9159 | 1.16 | 0 | 60    |         | 1    |   | K.ISTPAETAPRPSYSSK.S + [+30.0106 at A5]               |
| <a href="#">2213</a> | 260 - 276   | 606.9802  | 1817.9188 | 1817.9159 | 1.59 | 0 | 58    |         | 1    |   | K.ISTPAETAPRPSYSSK.S + [+30.0106 at A5]               |
| <a href="#">2214</a> | 260 - 276   | 606.9807  | 1817.9203 | 1817.9159 | 2.42 | 0 | 60    |         | 1    |   | K.ISTPAETAPRPSYSSK.S + [+30.0106 at A5]               |
| <a href="#">2321</a> | 260 - 276   | 633.6356  | 1897.8849 | 1897.8822 | 1.41 | 0 | 97    |         | 1    |   | K.ISTPAETAPRPSYSSK.S + Phospho (ST); [+30.0106 at A5] |
| <a href="#">2322</a> | 260 - 276   | 949.9498  | 1897.8851 | 1897.8822 | 1.49 | 0 | 128   |         | 1    |   | K.ISTPAETAPRPSYSSK.S + Phospho (ST); [+30.0106 at A5] |
| <a href="#">2326</a> | 260 - 276   | 633.6358  | 1897.8856 | 1897.8822 | 1.79 | 0 | 101   |         | 1    |   | K.ISTPAETAPRPSYSSK.S + Phospho (ST); [+30.0106 at A5] |
| <a href="#">2327</a> | 260 - 276   | 633.6359  | 1897.8857 | 1897.8822 | 1.84 | 0 | 87    |         | 1    |   | K.ISTPAETAPRPSYSSK.S + Phospho (ST); [+30.0106 at A5] |
| <a href="#">2329</a> | 260 - 276   | 949.9504  | 1897.8862 | 1897.8822 | 2.10 | 0 | 93    |         | 1    |   | K.ISTPAETAPRPSYSSK.S + Phospho (ST); [+30.0106 at A5] |
| <a href="#">2332</a> | 260 - 276   | 949.9514  | 1897.8882 | 1897.8822 | 3.13 | 0 | 117   |         | 1    |   | K.ISTPAETAPRPSYSSK.S + Phospho (ST); [+30.0106 at A5] |
| <a href="#">1451</a> | 345 - 357   | 687.3349  | 1372.6553 | 1372.6544 | 0.63 | 0 | 88    | 1.2e-05 | 1    | U | K.TVEASPPDGMELEK.K                                    |
| <a href="#">1452</a> | 345 - 357   | 687.3351  | 1372.6556 | 1372.6544 | 0.87 | 0 | 100   | 7.2e-07 | 1    | U | K.TVEASPPDGMELEK.K                                    |
| <a href="#">1453</a> | 345 - 357   | 687.3351  | 1372.6556 | 1372.6544 | 0.90 | 0 | 113   | 4.5e-08 | 1    | U | K.TVEASPPDGMELEK.K                                    |
| <a href="#">1454</a> | 345 - 357   | 687.3352  | 1372.6559 | 1372.6544 | 1.10 | 0 | 91    | 6.2e-06 | 1    | U | K.TVEASPPDGMELEK.K                                    |
| <a href="#">1455</a> | 345 - 357   | 687.3356  | 1372.6566 | 1372.6544 | 1.59 | 0 | 91    | 6.7e-06 | 1    | U | K.TVEASPPDGMELEK.K                                    |
| <a href="#">1456</a> | 345 - 357   | 687.3356  | 1372.6566 | 1372.6544 | 1.62 | 0 | 99    | 1.1e-06 | 1    | U | K.TVEASPPDGMELEK.K                                    |
| <a href="#">1457</a> | 345 - 357   | 687.3357  | 1372.6569 | 1372.6544 | 1.81 | 0 | 110   | 8.6e-08 | 1    | U | K.TVEASPPDGMELEK.K                                    |
| <a href="#">1458</a> | 345 - 357   | 687.3358  | 1372.6570 | 1372.6544 | 1.86 | 0 | 105   | 2.3e-07 | 1    | U | K.TVEASPPDGMELEK.K                                    |
| <a href="#">1460</a> | 345 - 357   | 687.3359  | 1372.6572 | 1372.6544 | 2.00 | 0 | 105   | 2.7e-07 | 1    | U | K.TVEASPPDGMELEK.K                                    |
| <a href="#">1461</a> | 345 - 357   | 687.3359  | 1372.6573 | 1372.6544 | 2.08 | 0 | 92    | 5.1e-06 | 1    | U | K.TVEASPPDGMELEK.K                                    |
| <a href="#">1462</a> | 345 - 357   | 687.3365  | 1372.6584 | 1372.6544 | 2.89 | 0 | 93    | 4.1e-06 | 1    | U | K.TVEASPPDGMELEK.K                                    |
| <a href="#">1463</a> | 345 - 357   | 687.3369  | 1372.6593 | 1372.6544 | 3.56 | 0 | 71    | 0.00058 | 1    | U | K.TVEASPPDGMELEK.K                                    |
| <a href="#">1486</a> | 345 - 357   | 695.3320  | 1388.6495 | 1388.6493 | 0.15 | 0 | 83    | 3.9e-05 | 1    | U | K.TVEASPPDGMELEK.K + Oxidation (M)                    |
| <a href="#">1488</a> | 345 - 357   | 695.3328  | 1388.6511 | 1388.6493 | 1.27 | 0 | 80    | 7.7e-05 | 1    | U | K.TVEASPPDGMELEK.K + Oxidation (M)                    |
| <a href="#">1489</a> | 345 - 357   | 695.3329  | 1388.6512 | 1388.6493 | 1.32 | 0 | 92    | 5.7e-06 | 1    | U | K.TVEASPPDGMELEK.K + Oxidation (M)                    |
| <a href="#">1491</a> | 345 - 357   | 695.3329  | 1388.6513 | 1388.6493 | 1.40 | 0 | 71    | 0.00072 | 1    | U | K.TVEASPPDGMELEK.K + Oxidation (M)                    |
| <a href="#">1492</a> | 345 - 357   | 695.3330  | 1388.6514 | 1388.6493 | 1.46 | 0 | 77    | 0.00016 | 1    | U | K.TVEASPPDGMELEK.K + Oxidation (M)                    |

| Query                | Start - End | Observed | Mr(expt)  | Mr(calc)  | ppm M  | Score | Expect  | Rank | U | Peptide                           |
|----------------------|-------------|----------|-----------|-----------|--------|-------|---------|------|---|-----------------------------------|
| <a href="#">1493</a> | 345 - 357   | 695.3330 | 1388.6514 | 1388.6493 | 1.52 0 | 70    | 0.00086 | 1    | U | K.TVEASPPDGMEIK.K + Oxidation (M) |



## **SUPPLEMENTAL METHODS**

### **Supplemental Method 1.**

#### **Microscopy and staining with WGA AF488 and Propidium Iodide.**

To visualize initial fungal proliferation in tissue infected with  $\Delta see1$ , in comparison to the tissue infected with wild-type SG200 the area approx. 1–3 cm below the injection site was excised at 2 and 3 days post infection. The collected leaf samples were fixed in 100% ethanol and then incubated for 3-4 hours in 10% (w/v) KOH at 85°C. The samples were washed with Phosphate Saline buffer (PBS) repeatedly until the pH reached 7.4. Fungal hyphae were stained with WGA-AF488 (Invitrogen) and the plant cell wall was co-stained with propidium iodide (Sigma-Aldrich). Leaf samples were incubated in 1.5 mL staining solution (1  $\mu$ g/mL propidium iodide, 10  $\mu$ g/mL WGA-AF488). Samples were infiltrated 3 times at 250 bar pressure and were then decolorized in PBS and incubated in the dark at 4°C until microscopy.

### **Supplemental Method 2.**

#### **Mass Spectrometry Analysis.**

Gel bands containing the proteins of interest were subjected to a standard proteomic procedure during which proteins were reduced with 100 mM DTT for 30 min at 56°C, alkylated with iodoacetamide in darkness for 45 min at RT and digested overnight with sequencing grade modified trypsin (Promega Corporation, Madison, WI, USA; [www.promega.com](http://www.promega.com)). The resulting peptides were eluted from the gel with 0.1% TFA and 2% ACN and applied to the SwellGel Gallium-Chelated Discs (Thermo Fisher Scientific Inc., Waltham, MA, USA; [www.thermoscientific.com](http://www.thermoscientific.com)). Phosphopeptide isolation was carried out according to the manufacturer's instructions and finally the phosphopeptide fraction was eluted from Ga(III) resin with 100 mM ammonium bicarbonate. Liquid chromatography (LC) - mass spectrometry (MS) analyses of peptides were carried out using a nano-Acquity (Waters Corp., Milford, MA, USA; [www.waters.com](http://www.waters.com)) LC system coupled to an Orbitrap Velos (Thermo) mass spectrometer. Spectrometer parameters were as follows: capillary voltage, 2.5 kV; cone, 40 V; N<sub>2</sub> gas flow, 0; range, 300-2000 (m/z). The spectrometer was calibrated on a weekly basis with Calmix (caffeine, MRFA, Ultramark 1621). The

sample was first loaded from the autosampler tray (cooled to 10°C) to the pre-column (Symmetry C18, 180 µm × 20 mm, 5 µm; Waters) with a mobile phase of 100% MilliQ H<sub>2</sub>O acidified by 0.1% formic acid. The peptides were then transferred to a nano-UPLC column (BEH130 C18, 75 µm × 250 mm, 1.7 µm; Waters) by a gradient of 5-30% acetonitrile, 0.1% FA in 45 min. The column outlet was directly coupled to the ESI ion source of the Orbitrap Velos (Thermo Fisher Scientific) mass spectrometer working in the regime of data dependent MS to MS/MS switch. A blank run ensuring lack of cross contamination from previous samples preceded each analysis. After preprocessing of the raw data with Mascot Distiller software (version 2.1.1, Matrix Science), output lists of precursor and product ions were compared to NCBI nr database using Mascot database search engine (v2.1, Matrix Science). Search parameters included semiTrypsin enzyme specificity, one missed cleavage site, Cys carbamidomethyl fixed modification and variable modifications including Met oxidation and phosphorylation of Ser, Thr or Tyr residues. Protein mass and taxonomy were unrestricted, peptide mass tolerance was 20 ppm and the MS/MS tolerance was 0.8 Da. Proteins containing peptides with Mascot cut-off scores >50, indicating identity or extensive homology (p<0.05) of peptide, were considered positive identifications.

### **Supplemental Method 3.**

#### **Microarray Analysis.**

Microarray analyses were performed with 200 ng total RNA extracted from *U. maydis* infected seedling tissue at 6 dpi. For this time point, samples from three independent biological replicates were labeled and hybridized according to Agilent's One-Color Microarray-Based Gene Expression Analysis Low Input Quick Amp Labeling protocol (version 6.5). Cy5-labeled probes were hybridized to 4x44k custom-designed Agilent microarray chips for maize based on a previous 4x44k custom-designed Agilent microarray. The preparation of the one color spike mix labeling, hybridization, microarray washing and scanning was done by following the one color microarray based protocol from Agilent. Microarray image files were analyzed using Agilent's Feature Extraction software v. 10.5 which calculates for each spot a background

corrected signal intensity value (gProcessedSignal) that was used for further analysis. The microarray data obtained in this study were analyzed using the Partek Genomics Suite version 6.12. Expression values were normalized using the RMA method (Irizarry et al., 2003). Criteria for significance were a corrected p-value (per sample) with an FDR of 0.05 and a fold-change of >2. Differentially expressed genes were calculated by a 1-way ANOVA (Bewick et al., 2004).

#### **Supplemental Method 4.**

##### **Plasmid Constructs and Nucleic Acid Construction.**

Generation of the *U. maydis*  $\Delta see1$  mutant and the complementation strain was done as described previously in Schilling et al., 2014. For See1 ectopic overexpression in *U. maydis*, *um02239* coding sequence was amplified by PCR with primers that added appropriate restriction site using *U. maydis* SG200 DNA as a template. Next, the PCR-product was digested with SacII and XbaI and ligated into plasmid p123-Ppit2 (Mueller et al., 2013) to obtain *p123-Ppit2-See1* where *see1* is under the control of Pit2 promoter. For the electron microscopy constructs, *see1* along with the promoter and signal peptide was amplified from the *U. maydis* SG200 DNA. The reverse primer was integrated with a *3xHA* to make a fusion protein of See1-3xHA. The amplified fragment was digested with SbfI and NotI and ligated into the plasmid p123 (Aichinger et al., 2003) to obtain *p123-Psee1-See1-3xHA*. For generation of the secretory control *mCherry* was amplified from p123-mCherry (Aichinger et al., 2003) and promoter and signal peptide of *see1* was amplified from the previously generated *p123-Psee1-See1-3xHA*. Fusion fragment of *Psee1-SPSee1-mCherry 3xHA* was generated with the overhang ligation coding for signal peptide of See1 and mCherry. The PCR product was digested with SbfI and NotI and ligated into the p123 vector to obtain *p123-Psee1-SPsee1-mcherry-3xHA*. GFP was also amplified from p123, restriction digestion was done with the enzymes NcoI and NotI and ligated into the generated vector p123-Psee1 (this study) to obtain *p123-Psee1-GFP-3xHA*. All *U. maydis* strains used in this study have been listed in the Supplemental Table 4. For transient expression in maize plasmid pGreenII 0029-35S-*See1-mCherry*, was generated by amplifying the sequence of *See1* without its secretion signal from SG200 genomic DNA and integrating it into pGreenII 0029-35S

*CP1A-mCherry* (Mueller et al., 2013) by replacing *CP1A* with XbaI and SacI fragment. The control 35S- *PIP-YFP* was used from (Djamei et al., 2011). Constructs for the yeast two hybrid interaction were based on the vectors pGBKT7 and pGADT7 (Clontech). To construct pGBKT7-*See1*<sub>22-157</sub>, *See1* was amplified from the genomic DNA of *U. maydis*. The PCR products digested with NdeI and BamHI and ligated into plasmid pGBKT7 (Clontech, Mountain View, USA). All the primers used for the amplification of these genes have been mentioned in Supplemental Table 2. To obtain pGADT7 SGT1 full length from maize was amplified from cDNA, digested with NdeI and BamHI and ligated into pGADT7 (Clontech, Mountain View, USA). For expression in *N. benthamiana* and co-immunoprecipitation *See1-Myc* and *SGT1-HA* were cloned from the already generated yeast two hybrid constructs into pGreen000 (Hellens et al., 2000) via restriction sites SacI and XbaI (*See1*) and BamHI and XbaI (*SGT1*). The sequences coding for respective tags were integrated into the reverse primers for PCR amplification. Constructs for the microscopic interaction studies via BiFC were based on modified pUC-SPYNE-35S-*mCherry* and pUC-SPYCE-35S-*CFP* (Hemetsberger et al., 2012). PCR products of *See1* and *SGT1* were cloned into the BiFC-vectors via BamHI and XhoI restriction sites. Created BiFC vectors were transformed into *A. tumefaciens* GV3101 cells by following the protocol of (Sparkes et al., 2006).

For the in planta phosphorylation experiment, *See1*<sub>22-157</sub>, was amplified along with a reverse primer that was encoded a HA-tag (Supplemental Table 2), thus enabling the expression of gene with a C terminal HA-tag. The PCR product was cloned into DEX inducible vector pTA7001 (Aoyama and Chua, 1997) via the restriction enzymes SpeI and XbaI. Maize *SGT1* was initially cloned into Gateway entry vector pENTR-D-TOPO (Invitrogen) without a stop codon to make C-terminal StreptII-tag fusion and was then transferred into pGWB502-C-SF-TAP (Golisz et al., 2013) via LR clonase to generate 35S-*Zm-SGT1-2xStreptII-HIS*. Primers used to amplify these are included in Supplemental Table 2. All the other destination constructs used in the assay Nb-*SGT1*, salicylic acid induced protein kinase (SIPK), Nb-*MEK2*<sup>DD</sup>, Nb-*MEK2*<sup>KR</sup> and pROK empty were used from the previous study of (Hoser et al., 2013). The *Zm-SGT1* was amplified with the restrictions sited EcoRI and XhoI into the plasmid pGREG536 which is with the GAL4 promoter. This generated construct was used for the complementation assay of the yeast *sgt1* mutants to check for the functionality of the *Zm-SGT1* protein. The same plasmid was used for site directed

mutagenesis to perform a complementation assay with the yeast *sgt1* mutants using the phosphovariants of Zm-*SGT1*. For generation of the pET15b-HIS-Zm-*SGT1* for recombinant protein production in *E.coli*, SGT1 from cDNA of maize was amplified from the primers listed in Supplemental Table 2 with the restriction sites NdeI and BamHI. The protein expression vectors for Nt-*SIPK* and Nb-*MEK2* were used from the previous study of Hoser et al., 2013. The previously generated entry vector pENTR-D-TOPO-Zm-*SGT1* for the C terminal fusion was used in recombination cloning to generate all the destination vectors for the subcellular localization of the wild-type and the phosphovariants of Zm-*SGT1*.

## **Supplemental Method 5.**

### **Transient expression in *Z. mays*.**

For transient protein expression in maize, ballistic gene transfer method was implemented using the 1.6 µm gold particles (Bio-Rad, München, Germany). The gold particles were coated with the plasmids coding for the indicated genes driven under CaMV 35S promoter (Supplementary Table 2). For loading the plasmid onto the gold particles 2.5 M calcium chloride treatment and several washes of 100% ethanol were performed. The DNA labeled gold particles were resuspended in 100% ethanol and bombardment was performed using a PDS-1000/He system (Bio-Rad) onto 10 days old maize seedling leaves.

### **Micro-bombardment in *N. benthamiana* .**

Leaves from 2- to 4-week-old *N. benthamiana* plants were used to determine the subcellular locations of maize SGT1-eYFP variants. For transient gene expression in epidermal cells, plasmid DNA (3 µg) was adsorbed onto tungsten M17 particles (diameter, 1.1 µm; 350 mg), and then microbombardment was performed at a pressure of 1,100 pound-force per square inch using the Biolistic PDS-1000/He Particle Delivery System (Bio-Rad). Tissues were analyzed 24 h after bombardment.

## **Supplemental Method 6.**

### **Confocal Laser Scanning Microscopy for SGT1 localization in *N. benthamiana*.**

Transient intracellular fluorescence of the wild-type maize SGT1 and the phospho variants was observed by confocal laser scanning microscopy using a Nikon TE2000E EZ-C1 inverted confocal microscope equipped with 60x oil immersion objective lens (numerical aperture = 1.4). YFP was excited at 488 nm from an argon ion laser and the fluorescence signals were detected using the 515/30 emission filter. Scanning was performed in sequential mode to prevent bleed through. Images were collected from a single optical section and processed using the EZ C1 program (Nikon Instruments B.V. Europe, Amstelveen, The Netherlands). Optimal imaging parameters were set up for each experiment and were equal for each image dataset. Quantification of fluorescence intensities in the nuclear and cytoplasmic regions was performed using ImageJ software (Abramoff et al., 2004).

### **Supplemental References**

- Abramoff, M.D., Magalhaes, P.J., and Ram, S.J.** (2004). Image processing with ImageJ. *Biophotonics International* **11**: 36-42.
- Aichinger, C., Hansson, K., Eichhorn, H., Lessing, F., Mannhaupt, G., Mewes, W., and Kahmann, R.** (2003). Identification of plant-regulated genes in *Ustilago maydis* by enhancer-trapping mutagenesis. *Mol. Gen. Genomics* **270**: 303-314.
- Aoyama, T., and Chua, N.H.** (1997). A glucocorticoid-mediated transcriptional induction system in transgenic plants. *Plant J.* **11**: 605-612.
- Baulcombe, D.C., Saunders, G.R., Bevan, M.V., Mayo, M.A. and Harrison, B.D.** (1986) Expression of biologically active viral satellite RNA from the nuclear genome of transformed plants. *Nature* **321**: 446-449.
- Bewick, V., Cheek, L., and Ball, J.** (2004). Statistics review 9: one-way analysis of variance. *Crit. Care* **8**: 130–136.
- Djamei, A., Schipper, K., Rabe, F., Ghosh, A., Vincon, V., Kahnt, J., Osorio, S., Tohge, T., Fernie, A.R., Feussner, I., Feussner, K., Meinicke, P., Stierhof, Y.D., Schwarz, H., Macek, B., Mann, M., and Kahmann, R.** (2011). Metabolic priming by a secreted fungal effector. *Nature* **478**: 395-398.



- Golisz, A., Sikorski, P.J., Kruszka, K., and Kufel, J.** (2013). Arabidopsis thaliana LSM proteins function in mRNA splicing and degradation. *Nucl. Acid. Res.* **41**: 6232-6249.
- Hellens, R.P., Edwards, E.A., Leyland, N.R., Bean, S., and Mullineaux, P.M.** (2000). pGreen: a versatile and flexible binary Ti vector for *Agrobacterium*-mediated plant transformation. *Plant Mol. Biol.* **42**: 819-832.
- Hoser, R., Zurczak, M., Lichocka, M., Zuzga, S., Dadlez, M., Samuel, M.A., Ellis, B.E., Stuttmann, J., Parker, J.E., Hennig, J., and Krzymowska, M.** (2013). Nucleocytoplasmic partitioning of tobacco N receptor is modulated by SGT1. *New Phytol.* **200**: 158-171.
- Irizarry, R.A., Hobbs, B., Collin, F., Beazer-Barclay, Y.D., Antonellis, K.J., Scherf, U., and Speed, T.P.** (2003). Exploration, normalization and summaries on high density oligonucleotide array probe level data. *Biostatistics* **4**: 249-64.
- Mueller, A.N., Ziemann, S., Treitschke, S., Assmann, D., and Doehlemann, G.** (2013). Compatibility in the *Ustilago maydis*-maize interaction requires inhibition of host cysteine proteases by the fungal effector Pit2. *PLoS Pathog.* **9**: e1003177.
- Schilling, L., Matei, A., Redkar, A., Walbot, V., and Doehlemann, G.** (2014). Virulence of the maize smut *Ustilago maydis* is shaped by organ specific effectors. *Mol. Plant Pathol.* **15**: 780-789.
- Skibbe, D.S., Doehlemann, G., Fernandes, J., and Walbot, V.** (2010). Maize tumors caused by *Ustilago maydis* require organ-specific genes in host and pathogen. *Science* **328**: 89-92.
- Sparkes, I.A., Runions, J., Kearns, A., and Hawes, C.** (2006). Rapid, transient expression of fluorescent fusion proteins in tobacco plants and generation of stably transformed plants. *Nature protocols* **1**: 2019-2025.
